# Supplementary material for: Solexa Sequencing Identification of Conserved and Novel microRNAs in Backfat of Large White and Chinese Meishan Pigs
Source: PLoS One. 2012 Feb 15;7(2):e31426. doi: 10.1371/journal.pone.0031426 (PMC3280305; doi:10.1371/journal.pone.0031426)
Supplement: Table S3 — Detailed information of known porcine miRNAs in Large White and Meishan small libraries. (XLS) [file pone.0031426.s004.xls]

## Sheet: Sheet1
Table S3 Detailed information of known porcine miRNAs in Large White and Meishan small libraries
A. Known porcine miRNAs identified in Large White
>ssc-let-7c
TGTGTGCATCCGGGTTGAGGTAGTAGGTTGTATGGTTTAGAGTTACACCGTGGGAGTTAACTGTACAACCTTCTAGCTTTCCTTGGAGCACACT ssc-let-7c 94
.((((((.((((((..(((.(((.(((((((((((((..((.(..(.....)..).))))))))))))))).))).)))..)))))))))))). structure -43.30
***************TGAGGTAGTAGGTTGTATGGTT********************************************************* ssc-let-7c 22
.............GTTGAGGTAGTAGGTTGTATGGT.......................................................... t0009033 23 50
.............GTTGAGGTAGTAGGTTGTATGGTT......................................................... t0032305 24 7
.............GTTGAGGTAGTAGGTTGTATGG........................................................... t0032855 22 7
.............GTTGAGGTAGTAGGTTGTATG............................................................ t0206463 21 1
..............TTGAGGTAGTAGGTTGTATGGT.......................................................... t0000248 22 4993
..............TTGAGGTAGTAGGTTGTATGGTT......................................................... t0000351 23 3035
..............TTGAGGTAGTAGGTTGTATGG........................................................... t0001620 21 431
..............TTGAGGTAGTAGGTTGTATGGTTT........................................................ t0005896 24 89
..............TTGAGGTAGTAGGTTGTATG............................................................ t0007709 20 62
..............TTGAGGTAGTAGGTTGTAT............................................................. t0016430 19 21
..............TTGAGGTAGTAGGTTGTA.............................................................. t0074236 18 2
..............TTGAGGTAGTAGGTTGTATGGTTTA....................................................... t0190679 25 1
...............TGAGGTAGTAGGTTGTATGGTT......................................................... t0000006 22 648711
...............TGAGGTAGTAGGTTGTATGGT.......................................................... t0000022 21 150174
...............TGAGGTAGTAGGTTGTATGGTTT........................................................ t0000082 23 26412
...............TGAGGTAGTAGGTTGTATGG........................................................... t0000099 20 19189
...............TGAGGTAGTAGGTTGTAT............................................................. t0000150 18 12103
...............TGAGGTAGTAGGTTGTATG............................................................ t0000319 19 3435
...............TGAGGTAGTAGGTTGTATGGTTTA....................................................... t0006116 24 85
...............TGAGGTAGTAGGTTGTATGGTTTAG...................................................... t0042388 25 5
...............TGAGGTAGTAGGTTGTATGGTTTAGA..................................................... t0141319 26 1
................GAGGTAGTAGGTTGTATGGTT......................................................... t0000223 21 6180
................GAGGTAGTAGGTTGTATGGT.......................................................... t0000498 20 1722
................GAGGTAGTAGGTTGTATGGTTT........................................................ t0002324 22 284
................GAGGTAGTAGGTTGTATGG........................................................... t0003209 19 193
................GAGGTAGTAGGTTGTATG............................................................ t0008225 18 57
.................AGGTAGTAGGTTGTATGGTT......................................................... t0016516 20 21
.................AGGTAGTAGGTTGTATGGT.......................................................... t0043968 19 5
.................AGGTAGTAGGTTGTATGGTTT........................................................ t0284012 21 1
..................GGTAGTAGGTTGTATGGTT......................................................... t0002413 19 271
..................GGTAGTAGGTTGTATGGT.......................................................... t0035057 18 6
..................GGTAGTAGGTTGTATGGTTT........................................................ t0107627 20 2
...................GTAGTAGGTTGTATGGTT......................................................... t0014710 18 25
...................GTAGTAGGTTGTATGGTTT........................................................ t0044983 19 4
.....................................TAGAGTTACACCGTGGGAGTT.................................... t0042052 21 5
.....................................TAGAGTTACACCGTGGGAGTTAA.................................. t0223213 23 1
......................................................AGTTAACTGTACAACCTTCTAGCT................ t0153421 24 1
........................................................TTAACTGTACAACCTTCTAGC................. t0373142 21 1
............................................................CTGTACAACCTTCTAGCTTTCC............ t0015212 22 24
............................................................CTGTACAACCTTCTAGCTTTCCT........... t0098773 23 2
............................................................CTGTACAACCTTCTAGCTT............... t0185195 19 1
>ssc-let-7f
TGTGGGATGAGGTAGTAGATTGTATAGTTTTAGGGTCATACCCCATCTTGGAGATAACTATACAGTCTACTGTCTTTCCCACG ssc-let-7f 83
.((((((.(((..((((((((((((((((...(((.....))).(((.....)))))))))))))))))))..))))))))). structure -40.70
*******TGAGGTAGTAGATTGTATAGTT****************************************************** ssc-let-7f 22
......ATGAGGTAGTAGATTGTATAGTT...................................................... t0020731 23 15
......ATGAGGTAGTAGATTGTATAGT....................................................... t0033497 22 7
.......TGAGGTAGTAGATTGTATAGTT...................................................... t0000009 22 594156
.......TGAGGTAGTAGATTGTATAGT....................................................... t0000020 21 169195
.......TGAGGTAGTAGATTGTATAG........................................................ t0000075 20 27320
.......TGAGGTAGTAGATTGTATAGTTT..................................................... t0000107 23 17208
.......TGAGGTAGTAGATTGTAT.......................................................... t0000407 18 2409
.......TGAGGTAGTAGATTGTATA......................................................... t0000615 19 1280
.......TGAGGTAGTAGATTGTATAGTTTT.................................................... t0004254 24 135
........GAGGTAGTAGATTGTATAGTT...................................................... t0000225 21 6127
........GAGGTAGTAGATTGTATAGT....................................................... t0000469 20 1877
........GAGGTAGTAGATTGTATAG........................................................ t0001818 19 380
........GAGGTAGTAGATTGTATAGTTT..................................................... t0002435 22 267
........GAGGTAGTAGATTGTATA......................................................... t0014629 18 25
........GAGGTAGTAGATTGTATAGTTTT.................................................... t0054593 23 3
.........AGGTAGTAGATTGTATAGTT...................................................... t0014337 20 26
.........AGGTAGTAGATTGTATAGT....................................................... t0025506 19 11
.........AGGTAGTAGATTGTATAG........................................................ t0142410 18 1
..........GGTAGTAGATTGTATAGTT...................................................... t0001464 19 484
..........GGTAGTAGATTGTATAGT....................................................... t0002711 18 235
..........GGTAGTAGATTGTATAGTTT..................................................... t0031499 20 8
...........GTAGTAGATTGTATAGTT...................................................... t0006898 18 73
............TAGTAGATTGTATAGTTTTAGG................................................. t0058847 22 3
............TAGTAGATTGTATAGTTTTAGGG................................................ t0095605 23 2
............TAGTAGATTGTATAGTTT..................................................... t0107214 18 2
.............................TTAGGGTCATACCCCATCTTGGA............................... t0110357 23 2
.............................TTAGGGTCATACCCCATCTTGG................................ t0146433 22 1
.........................................................CTATACAGTCTACTGTCTTTC..... t0034246 21 7
.........................................................CTATACAGTCTACTGTCTTT...... t0055314 20 3
>ssc-let-7i
CTGGCTGAGGTAGTAGTTTGTGCTGTTGGTCGGGTTGTGACATTGCCCGCTGTGGAGATAACTGCGCAAGCTACTGCCTTGCTAG ssc-let-7i 85
(((((.(((((((((((((((((.(((((.(((((.........)))))))........))).)))))))))))))))))))))) structure -42.10
*****TGAGGTAGTAGTTTGTGCT************************************************************* ssc-let-7i 19
....CTGAGGTAGTAGTTTGTGCTGT........................................................... t0029440 22 9
....CTGAGGTAGTAGTTTGTGCTGTT.......................................................... t0218858 23 1
....CTGAGGTAGTAGTTTGTGCTGTTG......................................................... t0324771 24 1
.....TGAGGTAGTAGTTTGTGCTGT........................................................... t0000059 21 37341
.....TGAGGTAGTAGTTTGTGCTGTT.......................................................... t0000210 22 6703
.....TGAGGTAGTAGTTTGTGCTG............................................................ t0000277 20 4225
.....TGAGGTAGTAGTTTGTGCTGTTG......................................................... t0000500 23 1719
.....TGAGGTAGTAGTTTGTGCT............................................................. t0001551 19 455
.....TGAGGTAGTAGTTTGTGC.............................................................. t0001609 18 435
.....TGAGGTAGTAGTTTGTGCTGTTGG........................................................ t0042712 24 5
.....TGAGGTAGTAGTTTGTGCTGTTGGT....................................................... t0064722 25 3
......GAGGTAGTAGTTTGTGCTGT........................................................... t0001624 20 430
......GAGGTAGTAGTTTGTGCTG............................................................ t0006644 19 77
......GAGGTAGTAGTTTGTGCTGTT.......................................................... t0007578 21 64
......GAGGTAGTAGTTTGTGCTGTTG......................................................... t0009217 22 48
......GAGGTAGTAGTTTGTGCT............................................................. t0045804 18 4
.......AGGTAGTAGTTTGTGCTGT........................................................... t0018852 19 17
........GGTAGTAGTTTGTGCTGT........................................................... t0000804 18 884
........GGTAGTAGTTTGTGCTGTT.......................................................... t0001867 19 370
........GGTAGTAGTTTGTGCTGTTG......................................................... t0029250 20 9
.........GTAGTAGTTTGTGCTGTT.......................................................... t0021229 18 14
...................GTGCTGTTGGTCGGGTTGTGAC............................................ t0334172 22 1
....................................GTGACATTGCCCGCTGTGGAGATAAC....................... t0191110 26 1
....................................................TGGAGATAACTGCGCAAGC.............. t0133272 19 1
.............................................................CTGCGCAAGCTACTGCCTTGC... t0006922 21 72
.............................................................CTGCGCAAGCTACTGCCTTGCT.. t0010991 22 38
.............................................................CTGCGCAAGCTACTGCCTTG.... t0023978 20 12
..............................................................TGCGCAAGCTACTGCCTTGCT.. t0086883 21 2
..............................................................TGCGCAAGCTACTGCCTTG.... t0371117 19 1
>ssc-mir-101a-1
GACTGAACTGTCCTTTTTCGGTTATCATGGTACCGATGCTGTATATCTGAAAGGTACAGTACTGTGATAACTGAAGAATGGTGGTGCCATC ssc-mir-101a-1 91
...((.((..((.((((((((((((((((((((.(.((((............))))).)))))))))))))))))))).))..))..)).. structure -32.80
******************************************************TACAGTACTGTGATAACTGAA**************** ssc-miR-101a 21
..................................GATGCTGTATATCTGAAAG...................................... t0204756 19 1
.................................................AAAGGTACAGTACTGTGATAACTGA................. t0044775 25 4
..................................................AAGGTACAGTACTGTGATAACT................... t0052827 22 4
..................................................AAGGTACAGTACTGTGATAACTGA................. t0185996 24 1
...................................................AGGTACAGTACTGTGATAACTGA................. t0316245 23 1
....................................................GGTACAGTACTGTGATAACTGA................. t0026720 22 10
....................................................GGTACAGTACTGTGATAACTG.................. t0209583 21 1
....................................................GGTACAGTACTGTGATAACT................... t0370689 20 1
.....................................................GTACAGTACTGTGATAACTGA................. t0000132 21 13699
.....................................................GTACAGTACTGTGATAACTGAA................ t0000262 22 4651
.....................................................GTACAGTACTGTGATAACTG.................. t0000325 20 3355
.....................................................GTACAGTACTGTGATAACT................... t0000360 19 2897
.....................................................GTACAGTACTGTGATAACTGAAG............... t0002385 23 276
.....................................................GTACAGTACTGTGATAAC.................... t0005136 18 107
.....................................................GTACAGTACTGTGATAACTGAAGA.............. t0032441 24 7
......................................................TACAGTACTGTGATAACTGAAG............... t0000044 22 60713
......................................................TACAGTACTGTGATAACTGAA................ t0000147 21 12255
......................................................TACAGTACTGTGATAACTGA................. t0000179 20 8697
......................................................TACAGTACTGTGATAACTGAAGA.............. t0000238 23 5510
......................................................TACAGTACTGTGATAACTG.................. t0000640 19 1189
......................................................TACAGTACTGTGATAACT................... t0003351 18 183
......................................................TACAGTACTGTGATAACTGAAGAA............. t0010063 24 43
......................................................TACAGTACTGTGATAACTGAAGAAT............ t0163900 25 1
.......................................................ACAGTACTGTGATAACTGAAG............... t0004395 21 130
.......................................................ACAGTACTGTGATAACTGAA................ t0012911 20 30
.......................................................ACAGTACTGTGATAACTGA................. t0021787 19 14
.......................................................ACAGTACTGTGATAACTGAAGA.............. t0024869 22 11
.......................................................ACAGTACTGTGATAACTG.................. t0283867 18 1
........................................................CAGTACTGTGATAACTGAAGA.............. t0031664 21 8
........................................................CAGTACTGTGATAACTGAA................ t0044358 19 4
........................................................CAGTACTGTGATAACTGAAGAAT............ t0067843 23 3
........................................................CAGTACTGTGATAACTGAAGAA............. t0079015 22 2
........................................................CAGTACTGTGATAACTGAAG............... t0085412 20 2
........................................................CAGTACTGTGATAACTGA................. t0267111 18 1
.........................................................AGTACTGTGATAACTGAAG............... t0049020 19 4
.........................................................AGTACTGTGATAACTGAAGA.............. t0255524 20 1
..........................................................GTACTGTGATAACTGAAG............... t0029035 18 9
>ssc-mir-101a-2
GGCTGCCCTGGCTCAGTTATCACAGTGCTGATGCTGTCCATTCTAAAGGTACAGTACTGTGATAACTGAAGGATGGCAGCC ssc-mir-101a-2 81
(((((((.....((((((((((((((((((.((((............)))))))))))))))))))))).....))))))) structure -45.40
*************************************************TACAGTACTGTGATAACTGAA*********** ssc-miR-101a 21
............TCAGTTATCACAGTGCTGATG................................................ t0007191 21 69
............TCAGTTATCACAGTGCTGATGC............................................... t0012491 22 32
............TCAGTTATCACAGTGCTGATGCT.............................................. t0027729 23 9
............TCAGTTATCACAGTGCTGA.................................................. t0305143 19 1
.............CAGTTATCACAGTGCTGATGC............................................... t0016147 21 22
.............CAGTTATCACAGTGCTGATG................................................ t0025164 20 11
.............CAGTTATCACAGTGCTGATGCT.............................................. t0088237 22 2
..............AGTTATCACAGTGCTGATGC............................................... t0227519 20 1
..............AGTTATCACAGTGCTGATG................................................ t0312198 19 1
..............AGTTATCACAGTGCTGATGCTG............................................. t0335630 22 1
..................................TGTCCATTCTAAAGGTACAGTACT....................... t0128056 24 2
..................................TGTCCATTCTAAAGGTACAGT.......................... t0175167 21 1
.......................................ATTCTAAAGGTACAGTACTGTGA................... t0188773 23 1
..........................................CTAAAGGTACAGTACTGTGATAACT.............. t0041339 25 5
..........................................CTAAAGGTACAGTACTGTGATAACTGA............ t0055366 27 3
............................................AAAGGTACAGTACTGTGATAACTGA............ t0044775 25 4
.............................................AAGGTACAGTACTGTGATAACT.............. t0052827 22 4
.............................................AAGGTACAGTACTGTGATAACTGA............ t0185996 24 1
..............................................AGGTACAGTACTGTGATAACTGA............ t0316245 23 1
...............................................GGTACAGTACTGTGATAACTGA............ t0026720 22 10
...............................................GGTACAGTACTGTGATAACTG............. t0209583 21 1
...............................................GGTACAGTACTGTGATAACT.............. t0370689 20 1
................................................GTACAGTACTGTGATAACTGA............ t0000132 21 13699
................................................GTACAGTACTGTGATAACTGAA........... t0000262 22 4651
................................................GTACAGTACTGTGATAACTG............. t0000325 20 3355
................................................GTACAGTACTGTGATAACT.............. t0000360 19 2897
................................................GTACAGTACTGTGATAACTGAAG.......... t0002385 23 276
................................................GTACAGTACTGTGATAAC............... t0005136 18 107
.................................................TACAGTACTGTGATAACTGAAG.......... t0000044 22 60713
.................................................TACAGTACTGTGATAACTGAA........... t0000147 21 12255
.................................................TACAGTACTGTGATAACTGA............ t0000179 20 8697
.................................................TACAGTACTGTGATAACTG............. t0000640 19 1189
.................................................TACAGTACTGTGATAACT.............. t0003351 18 183
.................................................TACAGTACTGTGATAACTGAAGG......... t0007138 23 70
.................................................TACAGTACTGTGATAACTGAAGGA........ t0026790 24 10
..................................................ACAGTACTGTGATAACTGAAG.......... t0004395 21 130
..................................................ACAGTACTGTGATAACTGAA........... t0012911 20 30
..................................................ACAGTACTGTGATAACTGA............ t0021787 19 14
..................................................ACAGTACTGTGATAACTG............. t0283867 18 1
..................................................ACAGTACTGTGATAACTGAAGG......... t0300223 22 1
...................................................CAGTACTGTGATAACTGAA........... t0044358 19 4
...................................................CAGTACTGTGATAACTGAAGGA........ t0053367 22 3
...................................................CAGTACTGTGATAACTGAAG.......... t0085412 20 2
...................................................CAGTACTGTGATAACTGAAGG......... t0095435 21 2
...................................................CAGTACTGTGATAACTGA............ t0267111 18 1
....................................................AGTACTGTGATAACTGAAG.......... t0049020 19 4
.....................................................GTACTGTGATAACTGAAG.......... t0029035 18 9
>ssc-mir-103
CTTACTGCCCTCGGCTTCTTTACAGTGCTGCCTTGTTGCATATGGATCAAGCAGCATTGTACAGGGCTATGAAGGCACTGAG ssc-mir-103 82
((((.((((.((((((.((.(((((((((((.(((.(.(....).).)))))))))))))).))))))..)).)))).)))) structure -33.40
*************************************************AGCAGCATTGTACAGGGCTATGA********** ssc-miR-103 23
................................................AAGCAGCATTGTACAGGGCTATGA.......... t0137324 24 1
................................................AAGCAGCATTGTACAGGGCTATG........... t0237816 23 1
.................................................AGCAGCATTGTACAGGGCTATGA.......... t0000019 23 173058
.................................................AGCAGCATTGTACAGGGCTATG........... t0000113 22 16151
.................................................AGCAGCATTGTACAGGGCTAT............ t0001646 21 425
.................................................AGCAGCATTGTACAGGGCTATGAA......... t0002506 24 258
.................................................AGCAGCATTGTACAGGGCTA............. t0005666 20 94
.................................................AGCAGCATTGTACAGGGC............... t0016353 18 21
.................................................AGCAGCATTGTACAGGGCT.............. t0016936 19 20
.................................................AGCAGCATTGTACAGGGCTATGAAG........ t0035736 25 6
..................................................GCAGCATTGTACAGGGCTATGA.......... t0000720 22 1025
..................................................GCAGCATTGTACAGGGCTATG........... t0004299 21 133
..................................................GCAGCATTGTACAGGGCTATGAA......... t0110412 23 2
..................................................GCAGCATTGTACAGGGCTAT............ t0129308 20 2
..................................................GCAGCATTGTACAGGGCTATGAAG........ t0233984 24 1
...................................................CAGCATTGTACAGGGCTATGA.......... t0002076 21 326
...................................................CAGCATTGTACAGGGCTATG........... t0014279 20 26
...................................................CAGCATTGTACAGGGCTATGAA......... t0040332 22 5
....................................................AGCATTGTACAGGGCTATGA.......... t0006497 20 79
....................................................AGCATTGTACAGGGCTATG........... t0025510 19 11
.....................................................GCATTGTACAGGGCTATGA.......... t0002458 19 264
.....................................................GCATTGTACAGGGCTATG........... t0010780 18 39
.....................................................GCATTGTACAGGGCTATGAA......... t0042320 20 5
......................................................CATTGTACAGGGCTATGA.......... t0016441 18 21
>ssc-mir-105-1
TGTGCATCGTAGTCAAATGCTCAGACTCCTGTGGTGGCTGCTCATGCACCACGGATGTTTGAGCATGTGCTACGGTGTCTA ssc-mir-105-1 81
...(((((((((.((.((((((((((..((((((((.(.......)))))))))..)))))))))).)))))))))))... structure -43.40
************TCAAATGCTCAGACTCCTGT************************************************* ssc-miR-105-1 20
............TCAAATGCTCAGACTCCTGTGGT.............................................. t0226000 23 1
............TCAAATGCTCAGACTCCTGTGG............................................... t0259283 22 1
>ssc-mir-106a
CCTTGGCCGTGTAAAAGTGCTTACAGTGCAGGTAGCTTTTTGAGATCTACTGCAATGCAAGCACTTCTTACATTACCATGG ssc-mir-106a 81
((.(((..((((((((((((((.((.(((((.(((.((.....)).)))))))).)).)))))))).))))))..))).)) structure -30.40
************AAAAGTGCTTACAGTGCAGGTAGC********************************************* ssc-miR-106a 24
............AAAAGTGCTTACAGTGCAGGTAG.............................................. t0004926 23 112
............AAAAGTGCTTACAGTGCAGG................................................. t0230761 20 1
.............AAAGTGCTTACAGTGCAGGTAG.............................................. t0001964 22 351
.............AAAGTGCTTACAGTGCAGGTAGC............................................. t0060658 23 3
.............AAAGTGCTTACAGTGCAGGT................................................ t0104773 20 2
.............AAAGTGCTTACAGTGCAGGTA............................................... t0269112 21 1
................GTGCTTACAGTGCAGGTAG.............................................. t0084971 19 2
>ssc-mir-107
TTCTCTCTGCTTTCAGCTTCTTTACAGTGTTGCCTTGTGGCATGGAGTTCAAGCAGCATTGTACAGGGCTATCAAAGCACAGAGAGC ssc-mir-107 87
((((((.((((((.((((.((.(((((((((((.(((.(((.....))))))))))))))))).))))))...)))))).)))))). structure -35.10
***************************************************AGCAGCATTGTACAGGGCTATCA************* ssc-miR-107 23
...................................................AGCAGCATTGTACAGGGCTAT............... t0001646 21 425
...................................................AGCAGCATTGTACAGGGCTA................ t0005666 20 94
...................................................AGCAGCATTGTACAGGGCTATC.............. t0007733 22 62
...................................................AGCAGCATTGTACAGGGCTATCA............. t0014134 23 26
...................................................AGCAGCATTGTACAGGGC.................. t0016353 18 21
...................................................AGCAGCATTGTACAGGGCT................. t0016936 19 20
....................................................GCAGCATTGTACAGGGCTATC.............. t0074202 21 2
....................................................GCAGCATTGTACAGGGCTAT............... t0129308 20 2
>ssc-mir-122
CCTTAGCAGAGCTGTGGAGTGTGACAATGGTGTTTGTGTCCAAACTATCAAACGCCATTATCACACTAAATAGCTACTGTTAGGC ssc-mir-122 85
.((((((((((((((..(((((((.(((((((((((.((....))...))))))))))).)))))))..)))))).)))))))). structure -44.20
**************TGGAGTGTGACAATGGTGTTTGT************************************************ ssc-miR-122 23
..............TGGAGTGTGACAATGGTGTTT.................................................. t0003562 21 169
..............TGGAGTGTGACAATGGTGTTTG................................................. t0004862 22 114
..............TGGAGTGTGACAATGGTGTTTGT................................................ t0006016 23 87
..............TGGAGTGTGACAATGGTGT.................................................... t0025715 19 11
..............TGGAGTGTGACAATGGTGTT................................................... t0031294 20 8
...............GGAGTGTGACAATGGTGTTTG................................................. t0055874 21 3
>ssc-mir-124a-1
TCAAGACCAGACTCTGCCCTCCGTGTTCACAGCGGACCTTGATTTAATGTCATACAATTAAGGCACGCGGTGAATGCCAAGAGCGGAGCCTACGGCTGCACTTGA ssc-mir-124a-1 105
(((((..(((.((((((.((..((((((((.(((..((((((((...........))))))))..))).))))))))..)).)))))).......)))..))))) structure -38.10
**********************************************************TAAGGCACGCGGTGAATGCCA************************** ssc-miR-124a 21
..........................................................TAAGGCACGCGGTGAATGC............................ t0044515 19 4
>ssc-mir-124a-2
AGGCCTCTCTCTCCGTGTTCACAGCGGACCTTGATTTAAATGTCCATACAATTAAGGCACGCGGTGAATGCCAAGAATGGGGCTG ssc-mir-124a-2 85
.((((((..(((..((((((((.(((..((((((((.............))))))))..))).))))))))..)))..)))))). structure -35.92
****************************************************TAAGGCACGCGGTGAATGCCA************ ssc-miR-124a 21
....................................................TAAGGCACGCGGTGAATGC.............. t0044515 19 4
>ssc-mir-125b
ACCAGACTTTTCCTAGTCCCTGAGACCCTAACTTGTGAGGTATTTTAGTAACATCACAAGTCAGGCTCTTGGGACCTAGGCGGAGGGGA ssc-mir-125b 89
.((...(((..(((((..((..(((.(((.((((((((..(((....)))...)))))))).))).)))..))..)))))..))).)). structure -40.60
****************TCCCTGAGACCCTAACTTGTGA*************************************************** ssc-miR-125b 22
................TCCCTGAGACCCTAACTTGTGA................................................... t0000045 22 60276
................TCCCTGAGACCCTAACTTGTG.................................................... t0000202 21 7185
................TCCCTGAGACCCTAACTTGT..................................................... t0000582 20 1379
................TCCCTGAGACCCTAACTTG...................................................... t0001723 19 406
................TCCCTGAGACCCTAACTTGTGAG.................................................. t0006360 23 81
................TCCCTGAGACCCTAACTT....................................................... t0011672 18 35
................TCCCTGAGACCCTAACTTGTGAGG................................................. t0363784 24 1
.................CCCTGAGACCCTAACTTGTGA................................................... t0017071 21 20
..................CCTGAGACCCTAACTTGTGA................................................... t0000842 20 834
..................CCTGAGACCCTAACTTGTG.................................................... t0002698 19 237
..................CCTGAGACCCTAACTTGT..................................................... t0013027 18 30
...................CTGAGACCCTAACTTGTGA................................................... t0028596 19 9
...................CTGAGACCCTAACTTGTGAGGT................................................ t0034399 22 7
....................TGAGACCCTAACTTGTGA................................................... t0017100 18 20
....................................................ATCACAAGTCAGGCTCTTGGGAC.............. t0003873 23 152
....................................................ATCACAAGTCAGGCTCTTGGGA............... t0007696 22 62
....................................................ATCACAAGTCAGGCTCTTGGG................ t0009529 21 46
....................................................ATCACAAGTCAGGCTCTTGG................. t0014616 20 25
.....................................................TCACAAGTCAGGCTCTTGGGAC.............. t0001733 22 404
.....................................................TCACAAGTCAGGCTCTTGGGA............... t0006778 21 75
.....................................................TCACAAGTCAGGCTCTTGGGACC............. t0032209 23 7
.....................................................TCACAAGTCAGGCTCTTGGG................ t0033222 20 7
......................................................CACAAGTCAGGCTCTTGGGAC.............. t0125732 21 2
......................................................CACAAGTCAGGCTCTTGGGACC............. t0262112 22 1
.......................................................ACAAGTCAGGCTCTTGGGACC............. t0000291 21 4022
.......................................................ACAAGTCAGGCTCTTGGGACCT............ t0000432 22 2149
.......................................................ACAAGTCAGGCTCTTGGGAC.............. t0000683 20 1097
.......................................................ACAAGTCAGGCTCTTGGGA............... t0005452 19 99
.......................................................ACAAGTCAGGCTCTTGGGACCTA........... t0008292 23 56
.......................................................ACAAGTCAGGCTCTTGGG................ t0009562 18 46
.......................................................ACAAGTCAGGCTCTTGGGACCTAG.......... t0044037 24 5
........................................................CAAGTCAGGCTCTTGGGACC............. t0014239 20 26
........................................................CAAGTCAGGCTCTTGGGACCT............ t0022483 21 13
........................................................CAAGTCAGGCTCTTGGGAC.............. t0239831 19 1
........................................................CAAGTCAGGCTCTTGGGACCTA........... t0314351 22 1
.........................................................AAGTCAGGCTCTTGGGACC............. t0080810 19 2
>ssc-mir-128
TGAGCTGTTGGATTCGGGGCCGTAGCACTGTCTGAGAGGTTTACATTTCTCACAGTGAACCGGTCTCTTTTTCAGCTGCTTC ssc-mir-128 82
.((((.((((((...(((((((...((((((..(((((((....)))))))))))))...)))))))...)))))).)))). structure -35.90
*************************************************TCACAGTGAACCGGTCTCTTTT*********** ssc-miR-128 22
..............CGGGGCCGTAGCACTGTCTG................................................ t0201713 20 1
..............CGGGGCCGTAGCACTGTCTGA............................................... t0283393 21 1
.................................................TCACAGTGAACCGGTCTCTTT............ t0002147 21 311
.................................................TCACAGTGAACCGGTCTCTTTT........... t0005377 22 100
.................................................TCACAGTGAACCGGTCTCT.............. t0007902 19 60
.................................................TCACAGTGAACCGGTCTCTT............. t0010030 20 43
.................................................TCACAGTGAACCGGTCTCTTTTT.......... t0029780 23 8
.................................................TCACAGTGAACCGGTCTC............... t0117785 18 2
...................................................ACAGTGAACCGGTCTCTTT............ t0045614 19 4
...................................................ACAGTGAACCGGTCTCTTTT........... t0187175 20 1
>ssc-mir-130a
CGGGCCGGAGCTCTTTTCACATTGTGCTACTGTCTGCACCTATCACTAGCAGTGCAATGTTAAAAGGGCATTGGCCACG ssc-mir-130a 79
((((((((.((((((((.((((((..((.(((..............))).))..)))))).)))))))).)))))).)) structure -33.64
*************************************************CAGTGCAATGTTAAAAGGGCAT******** ssc-miR-130a 22
.................................................CAGTGCAATGTTAAAAGGGCAT........ t0000832 22 844
.................................................CAGTGCAATGTTAAAAGGGCATT....... t0001329 23 536
.................................................CAGTGCAATGTTAAAAGGGC.......... t0001901 20 362
.................................................CAGTGCAATGTTAAAAGGGCA......... t0002626 21 245
.................................................CAGTGCAATGTTAAAAGGG........... t0011697 19 35
.................................................CAGTGCAATGTTAAAAGG............ t0016990 18 20
..................................................AGTGCAATGTTAAAAGGGCATT....... t0010757 22 39
..................................................AGTGCAATGTTAAAAGGGCAT........ t0011375 21 36
..................................................AGTGCAATGTTAAAAGGGC.......... t0022775 19 13
..................................................AGTGCAATGTTAAAAGGGCA......... t0036102 20 6
..................................................AGTGCAATGTTAAAAGGG........... t0080471 18 2
>ssc-mir-133a
CGGGACCCAAATGCTTTGCTAAAGCTGGTAAAATGGAACCAAATCAACTGTTGAATGGATTTGGTCCCCTTCAACCAGCTGTAGCTGCGCATTGACAGCGCCG ssc-mir-133a 103
((((.....(((((...((((.(((((((..((.((.((((((((............)))))))).)).))..))))))).))))...))))).....).))) structure -38.00
************************************************************TTGGTCCCCTTCAACCAGCTG********************** ssc-miR-133a 21
......................AGCTGGTAAAATGGAACCAAATC.......................................................... t0160506 23 1
...........................................................TTTGGTCCCCTTCAACCAGCTGT..................... t0011838 23 34
...........................................................TTTGGTCCCCTTCAACCAGCT....................... t0021560 21 14
...........................................................TTTGGTCCCCTTCAACCAGCTG...................... t0021738 22 14
...........................................................TTTGGTCCCCTTCAACCAGC........................ t0038120 20 6
...........................................................TTTGGTCCCCTTCAACCAGCTGTA.................... t0082306 24 2
............................................................TTGGTCCCCTTCAACCAGCTGT..................... t0013758 22 28
............................................................TTGGTCCCCTTCAACCAGCTGTAG................... t0022475 24 13
............................................................TTGGTCCCCTTCAACCAGCTGTA.................... t0038364 23 6
............................................................TTGGTCCCCTTCAACCAGCTG...................... t0112007 21 2
............................................................TTGGTCCCCTTCAACCAG......................... t0354128 18 1
.............................................................TGGTCCCCTTCAACCAGCTGT..................... t0072828 21 2
.............................................................TGGTCCCCTTCAACCAGCTGTAG................... t0183567 23 1
..............................................................GGTCCCCTTCAACCAGCTGT..................... t0053377 20 3
>ssc-mir-135-1
AGGCCTCGCTGTTCTCTATGGCTTTTTATTCCTATGTGATTCTACTGCTCATTCATATAGGGATTGGAGCCGTGGCGCACGGCGGGGACA ssc-mir-135-1 90
.(.(((((((((.(.((((((((((..((((((((((((.............)))))))))))).)))))))))).).))))))))).). structure -45.52
****************TATGGCTTTTTATTCCTATGTGA*************************************************** ssc-miR-135 23
................TATGGCTTTTTATTCCTATGTGA................................................... t0016188 23 22
................TATGGCTTTTTATTCCTATGT..................................................... t0090550 21 2
................TATGGCTTTTTATTCCTATGTG.................................................... t0127827 22 2
......................................................ATATAGGGATTGGAGCCGTGGC.............. t0247719 22 1
>ssc-mir-135-2
AGATAAATTCACTCTAGTGCTTTATGGCTTTTTATTCCTATGTGATAGTAATAAAGTCTCATGTAGGGATGGAAGCCATGAAATACATTGTGAAAAATCA ssc-mir-135-2 100
.(((...(((((....(((.((((((((((((.((((((((((((.(.(.....).).)))))))))))))))))))))))).)))...)))))..))). structure -35.10
**********************TATGGCTTTTTATTCCTATGTGA******************************************************* ssc-miR-135 23
......................TATGGCTTTTTATTCCTATGTGA....................................................... t0016188 23 22
......................TATGGCTTTTTATTCCTATGT......................................................... t0090550 21 2
......................TATGGCTTTTTATTCCTATGTG........................................................ t0127827 22 2
.............................................................TGTAGGGATGGAAGCCATGA................... t0340495 20 1
>ssc-mir-136
TGAGCCCTCGGAGGACTCCATTTGTTTTGATGATGGATTCTTACGCTCCATCATCGTCTCAAATGAGTCTTCAGAGGGTTCT ssc-mir-136 82
.((((((((.((((((((.(((((...((((((((((.........))))))))))...))))))))))))).)))))))). structure -45.80
**************ACTCCATTTGTTTTGATGATGGA********************************************* ssc-miR-136 23
...........AGGACTCCATTTGTTTTGATGA................................................. t0015997 22 22
...........AGGACTCCATTTGTTTTGATG.................................................. t0082426 21 2
...........AGGACTCCATTTGTTTTGATGAT................................................ t0092355 23 2
...........AGGACTCCATTTGTTTTGA.................................................... t0372898 19 1
............GGACTCCATTTGTTTTGATGAT................................................ t0080881 22 2
............GGACTCCATTTGTTTTGA.................................................... t0150535 18 1
..............ACTCCATTTGTTTTGATGATGG.............................................. t0003728 22 160
..............ACTCCATTTGTTTTGATGATG............................................... t0005723 21 93
..............ACTCCATTTGTTTTGATGATGGA............................................. t0043151 23 5
..............ACTCCATTTGTTTTGATGA................................................. t0059508 19 3
...............CTCCATTTGTTTTGATGATGG.............................................. t0252893 21 1
.................CCATTTGTTTTGATGATGG.............................................. t0277696 19 1
................................................CATCATCGTCTCAAATGAGTCT............ t0012823 22 30
................................................CATCATCGTCTCAAATGAGTC............. t0026797 21 10
................................................CATCATCGTCTCAAATGAG............... t0030684 19 8
................................................CATCATCGTCTCAAATGAGT.............. t0064737 20 3
.................................................ATCATCGTCTCAAATGAGTCT............ t0010794 21 38
.................................................ATCATCGTCTCAAATGAGT.............. t0040771 19 5
.................................................ATCATCGTCTCAAATGAGTC............. t0041740 20 5
.................................................ATCATCGTCTCAAATGAG............... t0063971 18 3
..................................................TCATCGTCTCAAATGAGTCT............ t0348861 20 1
....................................................ATCGTCTCAAATGAGTCT............ t0068854 18 3
....................................................ATCGTCTCAAATGAGTCTT........... t0168837 19 1
>ssc-mir-139
GTGTATTCTACAGTGCACGTGTCTCCAGTGTGGCTCGGAGGCTGGAGACGCAGGCCATGTTGGAGTAAC ssc-mir-139 69
...(((((((((..((..(((((((((((.(.......).)))))))))))..))..)).))))))).. structure -29.00
******TCTACAGTGCACGTGTCT********************************************* ssc-miR-139 18
......TCTACAGTGCACGTGTCTCCAGT........................................ t0001429 23 500
......TCTACAGTGCACGTGTCTCCAG......................................... t0001621 22 430
......TCTACAGTGCACGTGTCTCCA.......................................... t0004450 21 127
......TCTACAGTGCACGTGTCTCC........................................... t0006456 20 79
......TCTACAGTGCACGTGTCTC............................................ t0032501 19 7
........TACAGTGCACGTGTCTCCAGT........................................ t0025743 21 11
........TACAGTGCACGTGTCTCCAG......................................... t0067181 20 3
........TACAGTGCACGTGTCTCCA.......................................... t0261916 19 1
..........................AGTGTGGCTCGGAGGCTGG........................ t0190702 19 1
>ssc-mir-140
CCTGCCAGTGGTTTTACCCTATGGTAGGTTACGTCATGCTGTTCTACCACAGGGTAGAACCACGGACAGG ssc-mir-140 70
((((((.(((((((((((((.(((((((..(((......)))))))))).))))))))))))))).)))) structure -39.30
******AGTGGTTTTACCCTATGGTAG******************************************* ssc-miR-140 21
********************************************TACCACAGGGTAGAACCACGGAC*** ssc-miR-140* 23
....CCAGTGGTTTTACCCTATGG.............................................. t0110161 20 2
.....CAGTGGTTTTACCCTATGGTAG........................................... t0000153 22 11025
.....CAGTGGTTTTACCCTATGGTA............................................ t0006036 21 87
.....CAGTGGTTTTACCCTATGGTAGG.......................................... t0009469 23 46
.....CAGTGGTTTTACCCTATGGT............................................. t0010350 20 41
.....CAGTGGTTTTACCCTATGG.............................................. t0016221 19 22
.....CAGTGGTTTTACCCTATG............................................... t0078039 18 2
......AGTGGTTTTACCCTATGGTAG........................................... t0001095 21 652
......AGTGGTTTTACCCTATGGTA............................................ t0039922 20 5
......AGTGGTTTTACCCTATGGTAGG.......................................... t0122005 22 2
........................TAGGTTACGTCATGCTGTTCTACC...................... t0309844 24 1
..........................................TCTACCACAGGGTAGAACCACGG..... t0168484 23 1
...........................................CTACCACAGGGTAGAACCACGG..... t0190598 22 1
............................................TACCACAGGGTAGAACCACGGA.... t0000042 22 63707
............................................TACCACAGGGTAGAACCACGG..... t0000070 21 29820
............................................TACCACAGGGTAGAACCACGGAC... t0000158 23 10596
............................................TACCACAGGGTAGAACCACGGACA.. t0000687 24 1093
............................................TACCACAGGGTAGAACCACG...... t0000897 20 792
............................................TACCACAGGGTAGAACCAC....... t0004529 19 124
............................................TACCACAGGGTAGAACCA........ t0019813 18 16
............................................TACCACAGGGTAGAACCACGGACAG. t0037170 25 6
.............................................ACCACAGGGTAGAACCACGGA.... t0000066 21 31353
.............................................ACCACAGGGTAGAACCACGGAC... t0000072 22 28742
.............................................ACCACAGGGTAGAACCACGG..... t0000243 20 5122
.............................................ACCACAGGGTAGAACCACGGACA.. t0000404 23 2440
.............................................ACCACAGGGTAGAACCACG...... t0003124 19 199
.............................................ACCACAGGGTAGAACCAC....... t0010130 18 42
.............................................ACCACAGGGTAGAACCACGGACAG. t0016013 24 22
..............................................CCACAGGGTAGAACCACGGAC... t0000773 21 939
..............................................CCACAGGGTAGAACCACGGA.... t0002203 20 303
..............................................CCACAGGGTAGAACCACGGACA.. t0007225 22 68
..............................................CCACAGGGTAGAACCACGG..... t0015674 19 23
..............................................CCACAGGGTAGAACCACG...... t0364089 18 1
...............................................CACAGGGTAGAACCACGGAC... t0004773 20 117
...............................................CACAGGGTAGAACCACGGA.... t0005617 19 95
...............................................CACAGGGTAGAACCACGGACA.. t0011864 21 34
...............................................CACAGGGTAGAACCACGG..... t0021504 18 14
...............................................CACAGGGTAGAACCACGGACAGG t0052192 23 4
................................................ACAGGGTAGAACCACGGACAGG t0000659 22 1149
................................................ACAGGGTAGAACCACGGACAG. t0003359 21 182
................................................ACAGGGTAGAACCACGGAC... t0007953 19 60
................................................ACAGGGTAGAACCACGGACA.. t0009081 20 49
................................................ACAGGGTAGAACCACGGA.... t0020269 18 16
.................................................CAGGGTAGAACCACGGACAGG t0017772 21 19
.................................................CAGGGTAGAACCACGGAC... t0035838 18 6
..................................................AGGGTAGAACCACGGACAGG t0246529 20 1
>ssc-mir-145
CACCTTGTCCTCACGGTCCAGTTTTCCCAGGAATCCCTTAGATGCTGAGATGGGGATTCCTGGAAATACTGTTCTTGAGGTCATGG ssc-mir-145 86
..((.((.(((((.((..((((.((.((((((((((((.............)))))))))))).)).))))..))))))).)).)) structure -40.02
***************GTCCAGTTTTCCCAGGAATCCCTT*********************************************** ssc-miR-145 24
.............CGGTCCAGTTTTCCCAGGAATC................................................... t0163034 22 1
...............GTCCAGTTTTCCCAGGAATCCCT................................................ t0000342 23 3163
...............GTCCAGTTTTCCCAGGAATCCC................................................. t0000593 22 1349
...............GTCCAGTTTTCCCAGGAATCC.................................................. t0000828 21 852
...............GTCCAGTTTTCCCAGGAATC................................................... t0004248 20 135
...............GTCCAGTTTTCCCAGGAATCCCTT............................................... t0004294 24 133
...............GTCCAGTTTTCCCAGGAAT.................................................... t0004508 19 125
...............GTCCAGTTTTCCCAGGAA..................................................... t0022139 18 14
...............GTCCAGTTTTCCCAGGAATCCCTTA.............................................. t0346193 25 1
................TCCAGTTTTCCCAGGAATCCCT................................................ t0012918 22 30
................TCCAGTTTTCCCAGGAATCCC................................................. t0022646 21 13
................TCCAGTTTTCCCAGGAATCCCTT............................................... t0042610 23 5
................TCCAGTTTTCCCAGGAATC................................................... t0067471 19 3
................TCCAGTTTTCCCAGGAATCC.................................................. t0112813 20 2
..................CAGTTTTCCCAGGAATCCCT................................................ t0015602 20 23
..................CAGTTTTCCCAGGAATCCC................................................. t0024402 19 12
..................CAGTTTTCCCAGGAATCC.................................................. t0135737 18 1
...................AGTTTTCCCAGGAATCCC................................................. t0146582 18 1
...................................................GGGGATTCCTGGAAATACTGTTC............ t0354571 23 1
.....................................................GGATTCCTGGAAATACTGTTCT........... t0001192 22 595
.....................................................GGATTCCTGGAAATACTGTTCTT.......... t0012788 23 31
.....................................................GGATTCCTGGAAATACTGTTC............ t0017268 21 20
.....................................................GGATTCCTGGAAATACTGTT............. t0021318 20 14
.....................................................GGATTCCTGGAAATACTGT.............. t0045727 19 4
......................................................GATTCCTGGAAATACTGTTCT........... t0008951 21 51
......................................................GATTCCTGGAAATACTGTTCTT.......... t0008981 22 50
......................................................GATTCCTGGAAATACTGTT............. t0089567 19 2
......................................................GATTCCTGGAAATACTGTTCTTG......... t0119183 23 2
......................................................GATTCCTGGAAATACTGTTC............ t0136883 20 1
.......................................................ATTCCTGGAAATACTGTTCTT.......... t0002155 21 310
.......................................................ATTCCTGGAAATACTGTTCT........... t0002436 20 267
.......................................................ATTCCTGGAAATACTGTTCTTGA........ t0012816 23 30
.......................................................ATTCCTGGAAATACTGTTCTTG......... t0013761 22 28
.......................................................ATTCCTGGAAATACTGTTC............ t0016627 19 21
........................................................TTCCTGGAAATACTGTTCTTGA........ t0066053 22 3
........................................................TTCCTGGAAATACTGTTCTTG......... t0339865 21 1
>ssc-mir-146b
GAACTTTGGCCACCTGGCTCTGAGAACTGAATTCCATAGGCTGTGAGCTCTAGCAAATGCCCTAGGAACTCAGTTCTGGTGCCCGGCTGTGCTATAGTC ssc-mir-146b 99
..(((.((((((((.(((.((.((((((((.((((.((((..((..((....))..))..)))))))).)))))))))).))).)).)).)))).))). structure -41.10
********************TGAGAACTGAATTCCATAGGC********************************************************** ssc-miR-146b 21
...................CTGAGAACTGAATTCCATAGGCTGT....................................................... t0070909 25 3
...................CTGAGAACTGAATTCCATAGGCTG........................................................ t0164081 24 1
....................TGAGAACTGAATTCCATAGGCTGT....................................................... t0000363 24 2868
....................TGAGAACTGAATTCCATAGGCTG........................................................ t0000760 23 957
....................TGAGAACTGAATTCCATAGGCT......................................................... t0001584 22 443
....................TGAGAACTGAATTCCATAGGC.......................................................... t0003842 21 154
....................TGAGAACTGAATTCCATAGG........................................................... t0028552 20 9
....................TGAGAACTGAATTCCATAG............................................................ t0041932 19 5
....................TGAGAACTGAATTCCATA............................................................. t0308030 18 1
.....................GAGAACTGAATTCCATAGGCTGT....................................................... t0020046 23 16
.....................GAGAACTGAATTCCATAGGCTG........................................................ t0036178 22 6
.....................GAGAACTGAATTCCATAGGCT......................................................... t0063752 21 3
.......................GAACTGAATTCCATAGGCTGT....................................................... t0334615 21 1
........................AACTGAATTCCATAGGCTG........................................................ t0183286 19 1
.........................ACTGAATTCCATAGGCTGT....................................................... t0186030 19 1
.........................................................TGCCCTAGGAACTCAGTTCTGGT................... t0090281 23 2
>ssc-mir-148a
GAGGCAAAGTTCTGAGACACTCCGACTCTGAATATGATAGAAGTCAGTGCACTACAGAACTTTGTCTC ssc-mir-148a 68
((((((((((((((((.((((..(((((((.......))).))))))))..)).)))))))))))))) structure -28.20
*******************************************TCAGTGCACTACAGAACTTTGT*** ssc-miR-148a 22
....CAAAGTTCTGAGACACTCCGACT......................................... t0167190 23 1
.....AAAGTTCTGAGACACTCCGACT......................................... t0000464 22 1923
.....AAAGTTCTGAGACACTCCGAC.......................................... t0001583 21 443
.....AAAGTTCTGAGACACTCCGA........................................... t0002276 20 291
.....AAAGTTCTGAGACACTCCG............................................ t0009356 19 47
.....AAAGTTCTGAGACACTCCGACTCTG...................................... t0040662 25 5
.....AAAGTTCTGAGACACTCC............................................. t0095787 18 2
.....AAAGTTCTGAGACACTCCGACTCT....................................... t0107314 24 2
......AAGTTCTGAGACACTCCGACT......................................... t0042711 21 5
......AAGTTCTGAGACACTCCGA........................................... t0113894 19 2
..........................................GTCAGTGCACTACAGAACTTTGT... t0002358 23 279
...........................................TCAGTGCACTACAGAACTTTGT... t0000002 22 939917
...........................................TCAGTGCACTACAGAACTTTG.... t0000152 21 11228
...........................................TCAGTGCACTACAGAACTTT..... t0000244 20 5109
...........................................TCAGTGCACTACAGAACTT...... t0000447 19 2011
...........................................TCAGTGCACTACAGAACTTTGTC.. t0000639 23 1190
...........................................TCAGTGCACTACAGAACT....... t0001067 18 668
...........................................TCAGTGCACTACAGAACTTTGTCT. t0002419 24 270
............................................CAGTGCACTACAGAACTTTGT... t0004709 21 118
............................................CAGTGCACTACAGAACTTTGTCT. t0173777 23 1
............................................CAGTGCACTACAGAACTTT..... t0376225 19 1
.............................................AGTGCACTACAGAACTTTGT... t0000181 20 8610
.............................................AGTGCACTACAGAACTTTG.... t0009316 19 48
.............................................AGTGCACTACAGAACTTT..... t0011522 18 35
.............................................AGTGCACTACAGAACTTTGTC.. t0070159 21 3
.............................................AGTGCACTACAGAACTTTGTCT. t0320393 22 1
..............................................GTGCACTACAGAACTTTGT... t0013065 19 30
..............................................GTGCACTACAGAACTTTG.... t0183599 18 1
...............................................TGCACTACAGAACTTTGT... t0028278 18 9
>ssc-mir-153
AGCGGTGGCCAGTGTCATTTTTGTGATGTTGCAGCTAGTAATATGAGCCCAGTTGCATAGTCACAAAAGTGATCATTGGAAACTGTG ssc-mir-153 87
.(((((..(((((((((((((((((((..(((((((.((.......))..)))))))..))))))))))))).))))))..))))). structure -41.30
****************************************************TTGCATAGTCACAAAAGTGA*************** ssc-miR-153 20
....................................................TTGCATAGTCACAAAAGTGATC............. t0308395 22 1
>ssc-mir-15a
TTGGAGTAAAGTAGCAGCACATAATGGTTTGTGGATTTTGAAAAGGTGCAGGCCATATTGTGCTGCCTCAAAAATACAA ssc-mir-15a 79
..........(..((((((((..((((((((((..((.....))..))))))))))..))))))))..).......... structure -26.00
***********TAGCAGCACATAATGGTTTGT*********************************************** ssc-miR-15a 21
.........AGTAGCAGCACATAATGGTTTGT............................................... t0185005 23 1
...........TAGCAGCACATAATGGTTTGTGGA............................................ t0000368 24 2821
...........TAGCAGCACATAATGGTTTGTGG............................................. t0000503 23 1702
...........TAGCAGCACATAATGGTTTGTG.............................................. t0001759 22 396
...........TAGCAGCACATAATGGTTTGT............................................... t0003539 21 171
...........TAGCAGCACATAATGGTTTG................................................ t0007369 20 66
...........TAGCAGCACATAATGGTTT................................................. t0024838 19 11
...........TAGCAGCACATAATGGTT.................................................. t0024956 18 11
............AGCAGCACATAATGGTTTGTGGA............................................ t0012798 23 30
............AGCAGCACATAATGGTTTGTGG............................................. t0027628 22 10
............AGCAGCACATAATGGTTTGTG.............................................. t0053543 21 3
............AGCAGCACATAATGGTTTGT............................................... t0136005 20 1
.............GCAGCACATAATGGTTTGTGGA............................................ t0035921 22 6
.............GCAGCACATAATGGTTTGTGG............................................. t0042573 21 5
...............AGCACATAATGGTTTGTGG............................................. t0129117 19 2
................GCACATAATGGTTTGTGGA............................................ t0110599 19 2
.................CACATAATGGTTTGTGGA............................................ t0083881 18 2
......................AATGGTTTGTGGATTTTGAAA.................................... t0104719 21 2
........................TGGTTTGTGGATTTTGAAA.................................... t0329029 19 1
................................................CAGGCCATATTGTGCTGCCTCA......... t0097243 22 2
................................................CAGGCCATATTGTGCTGCCTC.......... t0143289 21 1
>ssc-mir-15b
TTGAGGCCTTAAAGTACTGTAGCAGCACATCATGGTTTACATACTACAATCAAGATGCGAATCATTATTTGCTGCTCTAGAAATTTAAGGAAATTCAT ssc-mir-15b 98
.((((.(((((((...(((.(((((((.((.((((((..(((.((.......)))))..)))))).)).))))))).)))...)))))))...)))). structure -32.70
*******************TAGCAGCACATCATGGTTTACA********************************************************* ssc-miR-15b 22
TTGAGGCCTTAAAGTACTG............................................................................... t0056603 19 3
...................TAGCAGCACATCATGGTTTACA......................................................... t0001092 22 654
...................TAGCAGCACATCATGGTTTAC.......................................................... t0001981 21 346
...................TAGCAGCACATCATGGTTTA........................................................... t0009459 20 47
...................TAGCAGCACATCATGGTTT............................................................ t0023294 19 12
...................TAGCAGCACATCATGGTTTACAT........................................................ t0038482 23 6
...................TAGCAGCACATCATGGTT............................................................. t0046592 18 4
....................AGCAGCACATCATGGTTTACA......................................................... t0118180 21 2
....................AGCAGCACATCATGGTTTAC.......................................................... t0136416 20 1
.....................GCAGCACATCATGGTTTACA......................................................... t0153606 20 1
.....................GCAGCACATCATGGTTTAC.......................................................... t0171049 19 1
.........................................................CGAATCATTATTTGCTGCTCTA................... t0148178 22 1
>ssc-mir-16-1
CAGTGCCTTAGCAGCACGTAAATATTGGCGTTAAGATTCTAAAATTATCTCCAGTATTAACTGTGCTGCTGAAGTAAGG ssc-mir-16-1 79
...(((.((((((((((((.((((((((.(.(((..........))).).)))))))).)).)))))))))).)))... structure -28.20
********TAGCAGCACGTAAATATTGGCG************************************************* ssc-miR-16 22
........TAGCAGCACGTAAATATTGGCG................................................. t0000112 22 16340
........TAGCAGCACGTAAATATTGG................................................... t0000370 20 2738
........TAGCAGCACGTAAATATTGGC.................................................. t0000391 21 2580
........TAGCAGCACGTAAATATTGGCGT................................................ t0000410 23 2381
........TAGCAGCACGTAAATATTG.................................................... t0002886 19 219
........TAGCAGCACGTAAATATT..................................................... t0012127 18 33
........TAGCAGCACGTAAATATTGGCGTT............................................... t0015122 24 24
.........AGCAGCACGTAAATATTGGCG................................................. t0006347 21 81
.........AGCAGCACGTAAATATTGGC.................................................. t0017867 20 19
.........AGCAGCACGTAAATATTGG................................................... t0019408 19 17
.........AGCAGCACGTAAATATTGGCGT................................................ t0038504 22 6
..........GCAGCACGTAAATATTGGCG................................................. t0012068 20 33
..........GCAGCACGTAAATATTGG................................................... t0025885 18 11
..........GCAGCACGTAAATATTGGCGT................................................ t0044080 21 5
..........GCAGCACGTAAATATTGGC.................................................. t0250884 19 1
...........CAGCACGTAAATATTGGCG................................................. t0089718 19 2
............AGCACGTAAATATTGGCG................................................. t0055975 18 3
.............GCACGTAAATATTGGCGT................................................ t0114619 18 2
..................................................CCAGTATTAACTGTGCTGCTGA....... t0017290 22 20
..................................................CCAGTATTAACTGTGCTGCT......... t0246835 20 1
...................................................CAGTATTAACTGTGCTGCTGA....... t0371849 21 1
....................................................AGTATTAACTGTGCTGCTGA....... t0251795 20 1
.......................................................ATTAACTGTGCTGCTGAA...... t0156659 18 1
>ssc-mir-16-2
TCCGCTCTAGCAGCACGTAAATATTGGCGTAGTAAAATAAATATTAAACACCAATATTATTGTGCTGCTTTAGCGTG ssc-mir-16-2 77
..((((..(((((((((..((((((((.((((((.......))))..)).))))))))..)))))))))..)))).. structure -30.50
*******TAGCAGCACGTAAATATTGGCG************************************************ ssc-miR-16 22
......CTAGCAGCACGTAAATATTGGCG................................................ t0044479 23 4
.......TAGCAGCACGTAAATATTGGCG................................................ t0000112 22 16340
.......TAGCAGCACGTAAATATTGG.................................................. t0000370 20 2738
.......TAGCAGCACGTAAATATTGGC................................................. t0000391 21 2580
.......TAGCAGCACGTAAATATTGGCGT............................................... t0000410 23 2381
.......TAGCAGCACGTAAATATTG................................................... t0002886 19 219
.......TAGCAGCACGTAAATATT.................................................... t0012127 18 33
.......TAGCAGCACGTAAATATTGGCGTA.............................................. t0014756 24 25
.......TAGCAGCACGTAAATATTGGCGTAG............................................. t0068850 25 3
.......TAGCAGCACGTAAATATTGGCGTAGT............................................ t0180890 26 1
........AGCAGCACGTAAATATTGGCG................................................ t0006347 21 81
........AGCAGCACGTAAATATTGGC................................................. t0017867 20 19
........AGCAGCACGTAAATATTGG.................................................. t0019408 19 17
........AGCAGCACGTAAATATTGGCGT............................................... t0038504 22 6
........AGCAGCACGTAAATATTGGCGTA.............................................. t0188015 23 1
........AGCAGCACGTAAATATTGGCGTAG............................................. t0282586 24 1
.........GCAGCACGTAAATATTGGCG................................................ t0012068 20 33
.........GCAGCACGTAAATATTGG.................................................. t0025885 18 11
.........GCAGCACGTAAATATTGGCGT............................................... t0044080 21 5
.........GCAGCACGTAAATATTGGC................................................. t0250884 19 1
..........CAGCACGTAAATATTGGCG................................................ t0089718 19 2
...........AGCACGTAAATATTGGCG................................................ t0055975 18 3
............GCACGTAAATATTGGCGT............................................... t0114619 18 2
.................................................ACCAATATTATTGTGCTGCTTT...... t0024316 22 12
.................................................ACCAATATTATTGTGCTGCTT....... t0090434 21 2
..................................................CCAATATTATTGTGCTGCTT....... t0049499 20 4
..................................................CCAATATTATTGTGCTGCTTT...... t0123867 21 2
>ssc-mir-17
GAATAATGTCAAAGTGCTTACAGTGCAGGTAGTGATAATGTGCATCTACTGCAGTGAAGGCACTTGTAGCATTATGG ssc-mir-17 77
..(((((((..((((((((.((.(((((.(((((........)).)))))))).)).))))))))...))))))).. structure -29.40
*********CAAAGTGCTTACAGTGCAGGTAG********************************************* ssc-miR-17 23
........TCAAAGTGCTTACAGTGCAGGTAG............................................. t0013844 24 27
........TCAAAGTGCTTACAGTGCAGGT............................................... t0031085 22 8
........TCAAAGTGCTTACAGTGCAGG................................................ t0043466 21 5
........TCAAAGTGCTTACAGTGCAGGTA.............................................. t0122760 23 2
........TCAAAGTGCTTACAGTGCAG................................................. t0374393 20 1
.........CAAAGTGCTTACAGTGCAGGTAG............................................. t0000245 23 5060
.........CAAAGTGCTTACAGTGCAGGT............................................... t0006587 21 78
.........CAAAGTGCTTACAGTGCAGGTA.............................................. t0007890 22 60
.........CAAAGTGCTTACAGTGCAGGTAGT............................................ t0008528 24 54
.........CAAAGTGCTTACAGTGCAGG................................................ t0010012 20 43
.........CAAAGTGCTTACAGTGCAG................................................. t0059002 19 3
..........AAAGTGCTTACAGTGCAGGTAG............................................. t0001964 22 351
..........AAAGTGCTTACAGTGCAGGTAGT............................................ t0038519 23 6
..........AAAGTGCTTACAGTGCAGGT............................................... t0104773 20 2
..........AAAGTGCTTACAGTGCAGGTA.............................................. t0269112 21 1
.............GTGCTTACAGTGCAGGTAG............................................. t0084971 19 2
..............................................TACTGCAGTGAAGGCACTTGTAG........ t0060717 23 3
...............................................ACTGCAGTGAAGGCACTTGTAG........ t0002655 22 242
...............................................ACTGCAGTGAAGGCACTTGT.......... t0016789 20 21
...............................................ACTGCAGTGAAGGCACTTGTAGC....... t0034532 23 7
...............................................ACTGCAGTGAAGGCACTTGTA......... t0036569 21 6
...............................................ACTGCAGTGAAGGCACTTGTAGCA...... t0095763 24 2
...............................................ACTGCAGTGAAGGCACTT............ t0155882 18 1
................................................CTGCAGTGAAGGCACTTGTAG........ t0027013 21 10
................................................CTGCAGTGAAGGCACTTGTAGC....... t0060789 22 3
.................................................TGCAGTGAAGGCACTTGTAG........ t0202767 20 1
.................................................TGCAGTGAAGGCACTTGTA......... t0277031 19 1
>ssc-mir-18
GTGCTTTTTGTTCTAAGGTGCATCTAGTGCAGATAGTGAAGTAGATTAGCATCTACTGCCCTAAGTGCTCCTTCTGGCATAAGAAGTTATGT ssc-mir-18 92
..(((((((((.((((((.(((..(((.((((.(((((..(.....)..)).))))))).)))..))).)))..))).)))))))))..... structure -27.30
*************TAAGGTGCATCTAGTGCAGATA********************************************************* ssc-miR-18 22
.............TAAGGTGCATCTAGTGCAGATAG........................................................ t0002538 23 254
.............TAAGGTGCATCTAGTGCAGA........................................................... t0025001 20 11
.............TAAGGTGCATCTAGTGCAGAT.......................................................... t0026339 21 10
.............TAAGGTGCATCTAGTGCAGATA......................................................... t0029761 22 8
.............TAAGGTGCATCTAGTGCAGATAGT....................................................... t0071963 24 3
..............AAGGTGCATCTAGTGCAGATAG........................................................ t0339529 22 1
......................................................ACTGCCCTAAGTGCTCCTTCTGG............... t0032414 23 7
......................................................ACTGCCCTAAGTGCTCCTTCT................. t0374613 21 1
>ssc-mir-181a
GAGTTTAGAGGTTGCTTCAGTGAACATTCAACGCTGTCGGTGAGTTTGGAATTCAAATCAAAACCATCGACCGTTGATTGTACCCTATGGCCAACCATCAGCTC ssc-mir-181a 104
(((((..(((((((((..((.(.(((.((((((..(((((((.((((.((.......)).))))))))))))))))).))).).))..)).))))).))))))) structure -35.30
**********************AACATTCAACGCTGTCGGTGAG************************************************************ ssc-miR-181a 22
.....................GAACATTCAACGCTGTCGGTGA............................................................. t0007687 22 62
.....................GAACATTCAACGCTGTCGGTGAGT........................................................... t0023118 24 13
.....................GAACATTCAACGCTGTCGGTG.............................................................. t0030630 21 8
.....................GAACATTCAACGCTGTCGGT............................................................... t0046544 20 4
.....................GAACATTCAACGCTGTCGG................................................................ t0221808 19 1
......................AACATTCAACGCTGTCGGTGA............................................................. t0000061 21 37195
......................AACATTCAACGCTGTCGGTGAGT........................................................... t0000065 23 33068
......................AACATTCAACGCTGTCGGTGAG............................................................ t0000233 22 5644
......................AACATTCAACGCTGTCGGTG.............................................................. t0000292 20 4019
......................AACATTCAACGCTGTCGGT............................................................... t0000390 19 2585
......................AACATTCAACGCTGTCGGTGAGTT.......................................................... t0001174 24 604
......................AACATTCAACGCTGTCGGTGAGTTT......................................................... t0003958 25 149
......................AACATTCAACGCTGTCGG................................................................ t0005237 18 104
.......................ACATTCAACGCTGTCGGTGAGT........................................................... t0006203 22 84
.......................ACATTCAACGCTGTCGGTGA............................................................. t0008755 20 52
.......................ACATTCAACGCTGTCGGT............................................................... t0013609 18 28
.......................ACATTCAACGCTGTCGGTGAG............................................................ t0017499 21 19
.......................ACATTCAACGCTGTCGGTG.............................................................. t0021648 19 14
.......................ACATTCAACGCTGTCGGTGAGTT.......................................................... t0032833 23 7
........................CATTCAACGCTGTCGGTGA............................................................. t0269147 19 1
.........................ATTCAACGCTGTCGGTGAGT........................................................... t0010371 20 41
.........................ATTCAACGCTGTCGGTGA............................................................. t0013606 18 28
.........................ATTCAACGCTGTCGGTGAG............................................................ t0087178 19 2
...........................TCAACGCTGTCGGTGAGT........................................................... t0058055 18 3
............................................................AAACCATCGACCGTTGATTGTACC.................... t0127287 24 2
.............................................................AACCATCGACCGTTGATTGTAC..................... t0057857 22 3
.............................................................AACCATCGACCGTTGATTGTACC.................... t0059284 23 3
..............................................................ACCATCGACCGTTGATTGTACC.................... t0002831 22 225
..............................................................ACCATCGACCGTTGATTGTAC..................... t0006825 21 74
..............................................................ACCATCGACCGTTGATTGT....................... t0007905 19 60
..............................................................ACCATCGACCGTTGATTGTA...................... t0022300 20 13
>ssc-mir-181b
ATGGCTGCACTCAACATTCATTGCTGTCGGTGGGTTTGAGTCTGAATCAACTCACTGATCAATGAATGCAAACTGCGGACCAAACA ssc-mir-181b 86
.((((((((.....(((((((((..(((((((((((.((.......)))))))))))))))))))))).....))))).))).... structure -35.00
************AACATTCATTGCTGTCGGTGGGTT************************************************** ssc-miR-181b 24
..........TCAACATTCATTGCTGTCGGTGG..................................................... t0029208 23 9
..........TCAACATTCATTGCTGTCGGTG...................................................... t0054324 22 3
..........TCAACATTCATTGCTGTCGGTGGG.................................................... t0284354 24 1
...........CAACATTCATTGCTGTCGGTGG..................................................... t0013814 22 27
...........CAACATTCATTGCTGTCGGTG...................................................... t0033935 21 7
...........CAACATTCATTGCTGTCGGTGGG.................................................... t0042364 23 5
...........CAACATTCATTGCTGTCGGT....................................................... t0042756 20 5
...........CAACATTCATTGCTGTCGGTGGGT................................................... t0062815 24 3
............AACATTCATTGCTGTCGGTGG..................................................... t0000230 21 5903
............AACATTCATTGCTGTCGGTGGGT................................................... t0000349 23 3038
............AACATTCATTGCTGTCGGTGGG.................................................... t0000401 22 2452
............AACATTCATTGCTGTCGGTG...................................................... t0000634 20 1197
............AACATTCATTGCTGTCGGTGGGTT.................................................. t0000865 24 815
............AACATTCATTGCTGTCGGT....................................................... t0001872 19 370
............AACATTCATTGCTGTCGGTGGGTTT................................................. t0008012 25 59
............AACATTCATTGCTGTCGG........................................................ t0012702 18 31
.............ACATTCATTGCTGTCGGTGGGT................................................... t0010724 22 39
.............ACATTCATTGCTGTCGGTGG..................................................... t0012385 20 32
.............ACATTCATTGCTGTCGGTGGG.................................................... t0017592 21 19
.............ACATTCATTGCTGTCGGTGGGTT.................................................. t0021096 23 15
.............ACATTCATTGCTGTCGGTG...................................................... t0029827 19 8
.............ACATTCATTGCTGTCGGTGGGTTT................................................. t0116619 24 2
...............ATTCATTGCTGTCGGTGG..................................................... t0055382 18 3
...............ATTCATTGCTGTCGGTGGG.................................................... t0061666 19 3
...............ATTCATTGCTGTCGGTGGGT................................................... t0105467 20 2
.................................................ACTCACTGATCAATGAATGC................. t0098898 20 2
.................................................ACTCACTGATCAATGAATGCAA............... t0127444 22 2
..................................................CTCACTGATCAATGAATGC................. t0070355 19 3
..................................................CTCACTGATCAATGAATGCA................ t0130054 20 2
>ssc-mir-181c
CAAGGGTTTGGGGGAACATTCAACCTGTCGGTGAGTTTGGGCAGCTCAGGCAAACCATCGACCGTTGAGTGGACCCCGAGGCCTGGA ssc-mir-181c 87
...((((((.((((..((((((((..(((((((.(((((...........)))))))))))).))))))))..)))).))))))... structure -42.80
**************AACATTCAACCTGTCGGTGAGT*************************************************** ssc-miR-181c 22
.............GAACATTCAACCTGTCGGTGAGT................................................... t0041633 23 5
..............AACATTCAACCTGTCGGTGAGT................................................... t0000949 22 750
..............AACATTCAACCTGTCGGTGA..................................................... t0004463 20 126
..............AACATTCAACCTGTCGGTGAGTT.................................................. t0006133 23 85
..............AACATTCAACCTGTCGGTGAG.................................................... t0009639 21 45
..............AACATTCAACCTGTCGGTGAGTTT................................................. t0015312 24 24
..............AACATTCAACCTGTCGGTG...................................................... t0027936 19 9
..............AACATTCAACCTGTCGGT....................................................... t0060945 18 3
...............ACATTCAACCTGTCGGTGAGT................................................... t0035567 21 6
...............ACATTCAACCTGTCGGTGA..................................................... t0334766 19 1
.................ATTCAACCTGTCGGTGAG.................................................... t0282023 18 1
...................................................AAACCATCGACCGTTGAGTGGA.............. t0184677 22 1
....................................................AACCATCGACCGTTGAGTGGAC............. t0048644 22 4
....................................................AACCATCGACCGTTGAGTGG............... t0060690 20 3
....................................................AACCATCGACCGTTGAGTGGA.............. t0085711 21 2
.....................................................ACCATCGACCGTTGAGTGGACC............ t0006332 22 81
.....................................................ACCATCGACCGTTGAGTGGAC............. t0009733 21 45
.....................................................ACCATCGACCGTTGAGTGGA.............. t0031056 20 8
.....................................................ACCATCGACCGTTGAGTGG............... t0031426 19 8
>ssc-mir-183
CTGTGTATGGCACTGGTAGAATTCACTGTGAACAGTCTCGGTCAGTGAATTACCGAAGGGCCATAAACAG ssc-mir-183 70
((((.((((((..(((((..(((((((((((......)))..)))))))))))))....)))))).)))) structure -26.20
*****TATGGCACTGGTAGAATTCACTG****************************************** ssc-miR-183 23
.....TATGGCACTGGTAGAATTCACT........................................... t0004308 22 133
.....TATGGCACTGGTAGAATTCACTG.......................................... t0005614 23 95
.....TATGGCACTGGTAGAATTCAC............................................ t0013544 21 28
.....TATGGCACTGGTAGAATTCA............................................. t0019292 20 17
.....TATGGCACTGGTAGAATTCACTGT......................................... t0020296 24 15
.....TATGGCACTGGTAGAATT............................................... t0027448 18 10
.....TATGGCACTGGTAGAATTC.............................................. t0199007 19 1
......ATGGCACTGGTAGAATTCACTG.......................................... t0004930 22 112
......ATGGCACTGGTAGAATTCACT........................................... t0007719 21 62
......ATGGCACTGGTAGAATTCACTGT......................................... t0012985 23 30
......ATGGCACTGGTAGAATTCA............................................. t0027312 19 10
......ATGGCACTGGTAGAATTCAC............................................ t0037366 20 6
>ssc-mir-184
CCAGTCACATCCCCTTATCACTTTTCCAGCCAGCTTTGTGACTCTAAATGTTGGACGGAGAACTGATAAGGGTAGGTGATTGA ssc-mir-184 83
.(((((((...(((((((((.((((((..(((((((((......)))).)))))..)))))).)))))))))...))))))). structure -38.60
***************************************************TGGACGGAGAACTGATAAGGGT********** ssc-miR-184 22
..................................................TTGGACGGAGAACTGATAAGGGT.......... t0017639 23 19
..................................................TTGGACGGAGAACTGATAAGG............ t0036085 21 6
..................................................TTGGACGGAGAACTGATAAG............. t0119505 20 2
..................................................TTGGACGGAGAACTGATAAGGG........... t0124360 22 2
...................................................TGGACGGAGAACTGATAAGGGT.......... t0000501 22 1705
...................................................TGGACGGAGAACTGATAAGGG........... t0002313 21 285
...................................................TGGACGGAGAACTGATAAGG............ t0004628 20 121
...................................................TGGACGGAGAACTGATAAGGGTA......... t0008388 23 55
...................................................TGGACGGAGAACTGATAAG............. t0010673 19 39
...................................................TGGACGGAGAACTGATAA.............. t0070729 18 3
...................................................TGGACGGAGAACTGATAAGGGTAG........ t0324831 24 1
....................................................GGACGGAGAACTGATAAGG............ t0071254 19 3
....................................................GGACGGAGAACTGATAAGGGT.......... t0101607 21 2
....................................................GGACGGAGAACTGATAAGGG........... t0115067 20 2
.....................................................GACGGAGAACTGATAAGGGTAG........ t0058846 22 3
>ssc-mir-185
GGTGAGGGATTGGAGAGAAAGGCAGTTCCTGATGGTCCCCTCCCCAGGGGCTGGCTTTCCTCTGGTCCTTCCCTCC ssc-mir-185 76
((.(((((((..(((.(((((.(((((((((..((......)).))))))))).))))))))..)))))))))... structure -45.50
**********TGGAGAGAAAGGCAGTTCCTGA******************************************** ssc-miR-185 22
..........TGGAGAGAAAGGCAGTTCCTGA............................................ t0000303 22 3779
..........TGGAGAGAAAGGCAGTTCCTG............................................. t0001959 21 352
..........TGGAGAGAAAGGCAGTTCCT.............................................. t0003074 20 204
..........TGGAGAGAAAGGCAGTTCC............................................... t0009805 19 44
..........TGGAGAGAAAGGCAGTTCCTGAT........................................... t0011626 23 35
..........TGGAGAGAAAGGCAGTTC................................................ t0023759 18 12
...........GGAGAGAAAGGCAGTTCCTGA............................................ t0017117 21 20
...........GGAGAGAAAGGCAGTTCCTG............................................. t0164913 20 1
...........GGAGAGAAAGGCAGTTCCTGAT........................................... t0253386 22 1
............................................CAGGGGCTGGCTTTCCTCTGGT.......... t0026740 22 10
............................................CAGGGGCTGGCTTTCCTCTGG........... t0075632 21 2
.............................................AGGGGCTGGCTTTCCTCTGGT.......... t0015067 21 24
.............................................AGGGGCTGGCTTTCCTCTGG........... t0061596 20 3
>ssc-mir-186
TGCTTATAACTTTCCAAAGAATTCTCCTTTTGGGCTTTATGATTTTATTTTAAGCCCAAAGGTGAATTTTTTGGGAAGTTTG ssc-mir-186 82
.......(((((((((((((((((.(((((.((((((...((......)).))))))))))).))))))))))))))))).. structure -36.20
**************CAAAGAATTCTCCTTTTGGGCTT********************************************* ssc-miR-186 23
.............CCAAAGAATTCTCCTTTTGGGC............................................... t0023387 22 12
.............CCAAAGAATTCTCCTTTTGGG................................................ t0042208 21 5
.............CCAAAGAATTCTCCTTTTGGGCT.............................................. t0119295 23 2
..............CAAAGAATTCTCCTTTTGGGCT.............................................. t0000136 22 13218
..............CAAAGAATTCTCCTTTTGGGCTT............................................. t0000198 23 7420
..............CAAAGAATTCTCCTTTTGGGC............................................... t0000261 21 4696
..............CAAAGAATTCTCCTTTTGGG................................................ t0000954 20 739
..............CAAAGAATTCTCCTTTTGGGCTTT............................................ t0001640 24 426
..............CAAAGAATTCTCCTTTTGG................................................. t0004036 19 145
..............CAAAGAATTCTCCTTTTG.................................................. t0014801 18 25
..............CAAAGAATTCTCCTTTTGGGCTTTAT.......................................... t0079564 26 2
...............AAAGAATTCTCCTTTTGGGCT.............................................. t0001186 21 598
...............AAAGAATTCTCCTTTTGGGCTT............................................. t0001476 22 479
...............AAAGAATTCTCCTTTTGGGC............................................... t0003059 20 205
...............AAAGAATTCTCCTTTTGGG................................................ t0010415 19 41
...............AAAGAATTCTCCTTTTGGGCTTT............................................ t0012142 23 33
...............AAAGAATTCTCCTTTTGG................................................. t0176188 18 1
....................................................AGCCCAAAGGTGAATTTTTTGG........ t0056660 22 3
.....................................................GCCCAAAGGTGAATTTTTTGG........ t0011301 21 36
.....................................................GCCCAAAGGTGAATTTTTT.......... t0336603 19 1
......................................................CCCAAAGGTGAATTTTTTGGGA...... t0046027 22 4
......................................................CCCAAAGGTGAATTTTTTGGGAA..... t0102855 23 2
......................................................CCCAAAGGTGAATTTTTTGGG....... t0120385 21 2
......................................................CCCAAAGGTGAATTTTTTGG........ t0183957 20 1
.......................................................CCAAAGGTGAATTTTTTGGGA...... t0020092 21 16
.......................................................CCAAAGGTGAATTTTTTGGG....... t0033715 20 7
>ssc-mir-196
TTGCTCAGCTGATCTGTGGCTTAGGTAGTTTCATGTTGTTGGGATTGAGTTTTGAACTCGGCAACAAGAAACTGCCTGAGTTACATCAGTCGGTTATCGTCGAGGGC ssc-mir-196 107
..((((.(((((..((((((((((((((((((.((((((((((.(..(...)..).)))))))))).)))))))))))))))))))))))(((......))).)))) structure -48.80
*********************TAGGTAGTTTCATGTTGTTGG***************************************************************** ssc-miR-196 21
.....................TAGGTAGTTTCATGTTGTTGG................................................................. t0000811 21 875
.....................TAGGTAGTTTCATGTTGTTGGG................................................................ t0001082 22 661
.....................TAGGTAGTTTCATGTTGTTGGGA............................................................... t0003887 23 152
.....................TAGGTAGTTTCATGTTGTTG.................................................................. t0010881 20 38
.....................TAGGTAGTTTCATGTTGTT................................................................... t0038562 19 6
......................AGGTAGTTTCATGTTGTTGGG................................................................ t0040423 21 5
......................AGGTAGTTTCATGTTGTTGG................................................................. t0053157 20 4
......................AGGTAGTTTCATGTTGTTGGGA............................................................... t0102172 22 2
.......................GGTAGTTTCATGTTGTTGG................................................................. t0331913 19 1
........................GTAGTTTCATGTTGTTGG................................................................. t0231468 18 1
.........................TAGTTTCATGTTGTTGGG................................................................ t0117866 18 2
>ssc-mir-199b
CCGTCTACCCAGTGTTTAGACTATCTGTTCAGGACTCCCAAATTGTACAGTAGTCTGCACATTGGTTAGGCTGG ssc-mir-199b 74
(((((((.(((((((.(((((((.((((.((((....))....)).))))))))))).))))))).))))).)) structure -30.20
*********************************************TACAGTAGTCTGCACATTGGTT******* ssc-miR-199b* 22
.......CCCAGTGTTTAGACTATCTGTTC............................................ t0000234 23 5584
.......CCCAGTGTTTAGACTATCTGTT............................................. t0000660 22 1148
.......CCCAGTGTTTAGACTATCTGT.............................................. t0001886 21 365
.......CCCAGTGTTTAGACTATCTG............................................... t0003997 20 147
.......CCCAGTGTTTAGACTATCTGTTCA........................................... t0008456 24 55
.......CCCAGTGTTTAGACTATCT................................................ t0015034 19 24
.......CCCAGTGTTTAGACTATC................................................. t0015874 18 22
........CCAGTGTTTAGACTATCTGTTC............................................ t0005651 22 94
........CCAGTGTTTAGACTATCTGTT............................................. t0011872 21 34
........CCAGTGTTTAGACTATCTGT.............................................. t0025957 20 11
........CCAGTGTTTAGACTATCTG............................................... t0033489 19 7
........CCAGTGTTTAGACTATCTGTTCA........................................... t0075184 23 2
.........CAGTGTTTAGACTATCTGTTC............................................ t0024404 21 12
.........CAGTGTTTAGACTATCTGTT............................................. t0034730 20 7
...........GTGTTTAGACTATCTGTTC............................................ t0056474 19 3
............................................GTACAGTAGTCTGCACATTGGT........ t0069631 22 3
............................................GTACAGTAGTCTGCACATTGG......... t0148305 21 1
.............................................TACAGTAGTCTGCACATTGGTT....... t0000049 22 49394
.............................................TACAGTAGTCTGCACATTGGT........ t0000071 21 28743
.............................................TACAGTAGTCTGCACATTGG......... t0000544 20 1515
.............................................TACAGTAGTCTGCACATTGGTTA...... t0000584 23 1377
.............................................TACAGTAGTCTGCACATTG.......... t0002999 19 210
.............................................TACAGTAGTCTGCACATT........... t0004593 18 122
.............................................TACAGTAGTCTGCACATTGGTTAG..... t0007309 24 67
..............................................ACAGTAGTCTGCACATTGGTT....... t0000025 21 112618
..............................................ACAGTAGTCTGCACATTGGT........ t0000056 20 41479
..............................................ACAGTAGTCTGCACATTGGTTA...... t0000121 22 15129
..............................................ACAGTAGTCTGCACATTGG......... t0000451 19 1972
..............................................ACAGTAGTCTGCACATTGGTTAG..... t0000989 23 717
..............................................ACAGTAGTCTGCACATTG.......... t0002204 18 303
..............................................ACAGTAGTCTGCACATTGGTTAGG.... t0327738 24 1
...............................................CAGTAGTCTGCACATTGGTT....... t0000293 20 4006
...............................................CAGTAGTCTGCACATTGGT........ t0000512 19 1675
...............................................CAGTAGTCTGCACATTGGTTA...... t0000783 21 917
...............................................CAGTAGTCTGCACATTGGTTAG..... t0004458 22 127
...............................................CAGTAGTCTGCACATTGG......... t0008247 18 56
................................................AGTAGTCTGCACATTGGTT....... t0001152 19 615
................................................AGTAGTCTGCACATTGGT........ t0002940 18 214
................................................AGTAGTCTGCACATTGGTTA...... t0005193 20 105
................................................AGTAGTCTGCACATTGGTTAGG.... t0090647 22 2
.................................................GTAGTCTGCACATTGGTT....... t0002212 18 301
.................................................GTAGTCTGCACATTGGTTA...... t0019857 19 16
>ssc-mir-19a
GCAGTCCTCTGTTAGTTTTGCATAGTTGCACTACAAGAAGAATGTAGTTGTGCAAATCTATGCAAAACTGATGGTGGCCTGC ssc-mir-19a 82
((((.((.(((((((((((((((((((((((((((.......))))...))))))..))))))))))))))))).)).)))) structure -39.10
************************************************TGTGCAAATCTATGCAAAACTGA*********** ssc-miR-19a 23
...............................................TTGTGCAAATCTATGCAAAACTG............ t0047393 23 4
...............................................TTGTGCAAATCTATGCAAAACTGA........... t0094077 24 2
...............................................TTGTGCAAATCTATGCAAAAC.............. t0153600 21 1
................................................TGTGCAAATCTATGCAAAACTGA........... t0005630 23 95
................................................TGTGCAAATCTATGCAAAACTG............ t0006118 22 85
................................................TGTGCAAATCTATGCAAAAC.............. t0041642 20 5
................................................TGTGCAAATCTATGCAAAACT............. t0050048 21 4
>ssc-mir-1a
CCGGTTGACGTACCTGCTTGGGGGACATACTTCTTTATGTGCCCATATGGACCTGCTAAGCTATGGAATGTAAAGAAGTATGTATTTCAGGCTGGGAACTCTCACCGG ssc-mir-1a 108
(((((.((.((.((((((((..(.((((((((((((((((..((((((((.....)))...))))).)))))))))))))))).)..))))).))).))))..))))) structure -46.50
***************************************************************TGGAATGTAAAGAAGTATGTA************************ ssc-miR-1a 21
............................................................CTATGGAATGTAAAGAAGTATG.......................... t0117651 22 2
..............................................................ATGGAATGTAAAGAAGTATGTA........................ t0098355 22 2
..............................................................ATGGAATGTAAAGAAGTATGT......................... t0256125 21 1
...............................................................TGGAATGTAAAGAAGTATGTAT....................... t0000125 22 14563
...............................................................TGGAATGTAAAGAAGTATGT......................... t0000294 20 3984
...............................................................TGGAATGTAAAGAAGTATGTA........................ t0000427 21 2180
...............................................................TGGAATGTAAAGAAGTATGTATT...................... t0001222 23 586
...............................................................TGGAATGTAAAGAAGTATG.......................... t0001520 19 464
...............................................................TGGAATGTAAAGAAGTAT........................... t0013197 18 29
...............................................................TGGAATGTAAAGAAGTATGTATTT..................... t0041582 24 5
................................................................GGAATGTAAAGAAGTATGTAT....................... t0007664 21 63
................................................................GGAATGTAAAGAAGTATGT......................... t0022221 19 13
................................................................GGAATGTAAAGAAGTATGTA........................ t0028061 20 9
................................................................GGAATGTAAAGAAGTATGTATT...................... t0053394 22 3
>ssc-mir-20
GTAGCACTAAAGTGCTTATAGTGCAGGTAGTGTTTAGTTATCTACTGCATTATGAGCACTTAAAGTACTGC ssc-mir-20 71
((((.(((.(((((((((((((((((.(((((......)).))))))))))))))))))))..))).)))) structure -31.00
*******TAAAGTGCTTATAGTGCAGGTA****************************************** ssc-miR-20 22
..AGCACTAAAGTGCTTATAGTGCAGGTAG......................................... t0266188 28 1
......CTAAAGTGCTTATAGTGCAGGTAG......................................... t0127789 24 2
.......TAAAGTGCTTATAGTGCAGGTAG......................................... t0000143 23 12665
.......TAAAGTGCTTATAGTGCAGG............................................ t0004231 20 136
.......TAAAGTGCTTATAGTGCAGGTAGT........................................ t0004716 24 118
.......TAAAGTGCTTATAGTGCAGGTA.......................................... t0008439 22 55
.......TAAAGTGCTTATAGTGCAGGT........................................... t0008870 21 51
.......TAAAGTGCTTATAGTGCAG............................................. t0067614 19 3
.......TAAAGTGCTTATAGTGCA.............................................. t0261191 18 1
........AAAGTGCTTATAGTGCAGGTAG......................................... t0003975 22 148
........AAAGTGCTTATAGTGCAGGTA.......................................... t0130973 21 2
........AAAGTGCTTATAGTGCAGG............................................ t0242211 19 1
.........AAGTGCTTATAGTGCAGGTAG......................................... t0028090 21 9
...........................................ACTGCATTATGAGCACTTAAAGT..... t0028110 23 9
...........................................ACTGCATTATGAGCACTTAAAG...... t0253297 22 1
............................................CTGCATTATGAGCACTTAAAGT..... t0032074 22 7
............................................CTGCATTATGAGCACTTAAAG...... t0340019 21 1
>ssc-mir-204
GGCTACAGTCCTTCTCATGTGACTCGTGGACTTCCCTTTGTCATCCTATGCCTGAGAATATATGAAGGAGGCTGGGAAGGCAAAGGGACGTTCAATTGTCATCACTGGC ssc-mir-204 109
.....((((.........(((((...(((((.((((((((((.(((((.((((...............))))))))).)))))))))).)))))...))))).)))).. structure -42.06
*******************************TTCCCTTTGTCATCCTATGCCT******************************************************** ssc-miR-204 22
...............................TTCCCTTTGTCATCCTATGCCT........................................................ t0032197 22 7
...............................TTCCCTTTGTCATCCTATGCC......................................................... t0095447 21 2
...............................TTCCCTTTGTCATCCTATGC.......................................................... t0270335 20 1
......................................................................GCTGGGAAGGCAAAGGGACGTT................. t0235818 22 1
......................................................................GCTGGGAAGGCAAAGGGACGT.................. t0321104 21 1
>ssc-mir-205
CTCTTGTCCTTCATTCCACCGGAGTCTGTCTCATACCCAACCAGATTTCAGTGGAGTGAAGCTCAGGAG ssc-mir-205 69
((((((..(((((((((((.((((((((.............)))))))).)))))))))))..)))))) structure -33.82
******TCCTTCATTCCACCGGAGTCTG***************************************** ssc-miR-205 22
......TCCTTCATTCCACCGGAGTCTGT........................................ t0011112 23 37
......TCCTTCATTCCACCGGAGTCTG......................................... t0014489 22 26
......TCCTTCATTCCACCGGAGTCT.......................................... t0052775 21 4
......TCCTTCATTCCACCGGAGTC........................................... t0340785 20 1
...........................................GATTTCAGTGGAGTGAAGCTC..... t0144468 21 1
...........................................GATTTCAGTGGAGTGAAGCTCA.... t0214535 22 1
............................................ATTTCAGTGGAGTGAAGCTCAGG.. t0139920 23 1
.............................................TTTCAGTGGAGTGAAGCTCAGG.. t0038770 22 5
>ssc-mir-21
TGTACCACCTTGTCGGGTAGCTTATCAGACTGATGTTGACTGTTGAATCTCATGGCAACAGCAGTCGATGGGCTGTCTGACATTTTGGTATC ssc-mir-21 92
.((((((...((((((..((((((((.(((((.(((((.((((.(.....)))))))))).)))))))))))))..))))))...)))))). structure -43.60
*****************TAGCTTATCAGACTGATGTTGA***************************************************** ssc-miR-21 22
................GTAGCTTATCAGACTGATGTTG...................................................... t0003272 22 188
................GTAGCTTATCAGACTGATGTTGA..................................................... t0007290 23 68
................GTAGCTTATCAGACTGATGTTGAC.................................................... t0010386 24 41
................GTAGCTTATCAGACTGATGTT....................................................... t0021347 21 14
................GTAGCTTATCAGACTGATGT........................................................ t0046414 20 4
................GTAGCTTATCAGACTGATGTTGACT................................................... t0192241 25 1
................GTAGCTTATCAGACTGATG......................................................... t0358252 19 1
.................TAGCTTATCAGACTGATGTTGAC.................................................... t0000013 23 278311
.................TAGCTTATCAGACTGATGTTGA..................................................... t0000017 22 226222
.................TAGCTTATCAGACTGATGTTG...................................................... t0000018 21 180404
.................TAGCTTATCAGACTGATGTTGACT................................................... t0000138 24 13091
.................TAGCTTATCAGACTGATGTT....................................................... t0000214 20 6530
.................TAGCTTATCAGACTGATGT........................................................ t0000382 19 2634
.................TAGCTTATCAGACTGATG......................................................... t0000806 18 883
.................TAGCTTATCAGACTGATGTTGACTG.................................................. t0023300 25 12
.................TAGCTTATCAGACTGATGTTGACTGT................................................. t0034149 26 7
.................TAGCTTATCAGACTGATGTTGACTGTT................................................ t0365022 27 1
..................AGCTTATCAGACTGATGTTGAC.................................................... t0000795 22 897
..................AGCTTATCAGACTGATGTTGA..................................................... t0001254 21 567
..................AGCTTATCAGACTGATGTTG...................................................... t0002656 20 241
..................AGCTTATCAGACTGATGTTGACT................................................... t0008243 23 56
..................AGCTTATCAGACTGATGTT....................................................... t0017029 19 20
..................AGCTTATCAGACTGATGT........................................................ t0172260 18 1
...................GCTTATCAGACTGATGTTGAC.................................................... t0002781 21 229
...................GCTTATCAGACTGATGTTGA..................................................... t0006025 20 87
...................GCTTATCAGACTGATGTTG...................................................... t0007707 19 62
...................GCTTATCAGACTGATGTTGACT................................................... t0040098 22 5
....................CTTATCAGACTGATGTTGAC.................................................... t0035533 20 6
....................CTTATCAGACTGATGTTGA..................................................... t0064741 19 3
....................CTTATCAGACTGATGTTG...................................................... t0092508 18 2
.....................TTATCAGACTGATGTTGAC.................................................... t0029522 19 9
.....................TTATCAGACTGATGTTGA..................................................... t0036300 18 6
.....................TTATCAGACTGATGTTGACT................................................... t0268340 20 1
......................TATCAGACTGATGTTGAC.................................................... t0072519 18 3
......................TATCAGACTGATGTTGACT................................................... t0225188 19 1
.......................ATCAGACTGATGTTGACT................................................... t0230035 18 1
....................................................TGGCAACAGCAGTCGATGGGCTGTC............... t0173537 25 1
.....................................................GGCAACAGCAGTCGATGGGCTGT................ t0249594 23 1
.......................................................CAACAGCAGTCGATGGGCTGTC............... t0007783 22 61
.......................................................CAACAGCAGTCGATGGGCTGT................ t0014770 21 25
.......................................................CAACAGCAGTCGATGGGCTGTCT.............. t0052135 23 4
.......................................................CAACAGCAGTCGATGGGCTG................. t0173819 20 1
........................................................AACAGCAGTCGATGGGCTGTC............... t0233007 21 1
.........................................................ACAGCAGTCGATGGGCTGTCT.............. t0104181 21 2
>ssc-mir-210
GCGCAGGGCAGCCACTGCCCACCGCACACTGCGCTGCTCCGGACCCACTGTGCGTGTGACAGCGGCTGATCTGTCC ssc-mir-210 76
..((((..(((((.(((..(((((((((.((.((((...))).).)).)))))).))).))).)))))..)))).. structure -34.60
***********************************************CTGTGCGTGTGACAGCGGCTGA******* ssc-miR-210 22
..............................................ACTGTGCGTGTGACAGCGGCTGA....... t0039699 23 5
..............................................ACTGTGCGTGTGACAGCGGCT......... t0064198 21 3
..............................................ACTGTGCGTGTGACAGCGG........... t0092149 19 2
...............................................CTGTGCGTGTGACAGCGGCTGA....... t0006314 22 82
...............................................CTGTGCGTGTGACAGCGGC.......... t0050624 19 4
...............................................CTGTGCGTGTGACAGCGGCTG........ t0051258 21 4
...............................................CTGTGCGTGTGACAGCGGCTGAT...... t0062213 23 3
...............................................CTGTGCGTGTGACAGCGGCT......... t0287069 20 1
...............................................CTGTGCGTGTGACAGCGG........... t0307317 18 1
................................................TGTGCGTGTGACAGCGGCTGAT...... t0280420 22 1
>ssc-mir-214
GGCCTGGCTGGACGGAGTTGTCATGTGTCTGCCTGTCTACACTTGCTGTGCAGAACATCCGCTCACCTGTACAGCAGGCACAGACAGGCAGTCACATGACAACCCAGCCT ssc-mir-214 110
.....((((((.....(((((((((((.((((((((((...((((((((((((.............))))))))))))...)))))))))).))))))))))))))))). structure -67.62
**********************************************************************ACAGCAGGCACAGACAGGCAG******************* ssc-miR-214 21
...........ACGGAGTTGTCATGTGTCT................................................................................ t0143686 19 1
.............................TGCCTGTCTACACTTGCTGTGC........................................................... t0001798 22 385
.............................TGCCTGTCTACACTTGCTGTG............................................................ t0013700 21 28
.............................TGCCTGTCTACACTTGCTGT............................................................. t0064994 20 3
.............................TGCCTGTCTACACTTGCTG.............................................................. t0106855 19 2
..............................GCCTGTCTACACTTGCTGTGC........................................................... t0014140 21 26
..............................GCCTGTCTACACTTGCTGTG............................................................ t0322713 20 1
...............................CCTGTCTACACTTGCTGTGC........................................................... t0076207 20 2
...............................CCTGTCTACACTTGCTGTGCAG......................................................... t0284950 22 1
...................................................AGAACATCCGCTCACCTGT........................................ t0081028 19 2
...................................................................TGTACAGCAGGCACAGACAGG...................... t0276603 21 1
....................................................................GTACAGCAGGCACAGACAGGCAG................... t0036268 23 6
....................................................................GTACAGCAGGCACAGACAGGCA.................... t0036996 22 6
....................................................................GTACAGCAGGCACAGACAGG...................... t0039422 20 5
....................................................................GTACAGCAGGCACAGACAGGCAGT.................. t0042139 24 5
....................................................................GTACAGCAGGCACAGACAGGC..................... t0052601 21 4
....................................................................GTACAGCAGGCACAGACAG....................... t0352990 19 1
.....................................................................TACAGCAGGCACAGACAGGCAGT.................. t0001479 23 479
.....................................................................TACAGCAGGCACAGACAGGCAG................... t0002088 22 323
.....................................................................TACAGCAGGCACAGACAGG...................... t0003357 19 183
.....................................................................TACAGCAGGCACAGACAGGCA.................... t0006245 21 83
.....................................................................TACAGCAGGCACAGACAGGC..................... t0011938 20 34
.....................................................................TACAGCAGGCACAGACAG....................... t0012271 18 32
......................................................................ACAGCAGGCACAGACAGGCAGT.................. t0001002 22 709
......................................................................ACAGCAGGCACAGACAGGCAG................... t0002694 21 237
......................................................................ACAGCAGGCACAGACAGGCA.................... t0011226 20 37
......................................................................ACAGCAGGCACAGACAGG...................... t0011805 18 34
......................................................................ACAGCAGGCACAGACAGGC..................... t0025838 19 11
.......................................................................CAGCAGGCACAGACAGGCAGT.................. t0043817 21 5
.......................................................................CAGCAGGCACAGACAGGCAG................... t0233044 20 1
........................................................................AGCAGGCACAGACAGGCAGT.................. t0019409 20 17
........................................................................AGCAGGCACAGACAGGCAG................... t0050388 19 4
........................................................................AGCAGGCACAGACAGGCA.................... t0363717 18 1
>ssc-mir-215
AGAGATGGTGTACAGGAAAATGACCTATGAATTGACAGACAATGTGGCTAAATCTGTCTGTCATTTCTGTAGGCCAATATTCTGTATATCTCTGCT ssc-mir-215 96
..(((.(((((((((((.(.((.((((((((.(((((((((((........)).))))))))).))).))))).)).).))))))))))))))... structure -36.90
*******************ATGACCTATGAATTGACAGAC******************************************************** ssc-miR-215 21
..................AATGACCTATGAATTGACAGAC........................................................ t0037698 22 6
..................AATGACCTATGAATTGACAGACA....................................................... t0120781 23 2
..................AATGACCTATGAATTGACAGA......................................................... t0185910 21 1
...................ATGACCTATGAATTGACAGACA....................................................... t0000352 22 3010
...................ATGACCTATGAATTGACAGAC........................................................ t0001416 21 503
...................ATGACCTATGAATTGACAGA......................................................... t0006599 20 77
...................ATGACCTATGAATTGACAGACAA...................................................... t0021554 23 14
...................ATGACCTATGAATTGACAG.......................................................... t0058881 19 3
...................ATGACCTATGAATTGACAGACAAT..................................................... t0376412 24 1
....................TGACCTATGAATTGACAGA......................................................... t0194676 19 1
........................................................TCTGTCATTTCTGTAGGCCAATA................. t0104800 23 2
........................................................TCTGTCATTTCTGTAGGCC..................... t0373310 19 1
>ssc-mir-216
GATGGCTGTGAGTTGGCTTAATCTCAGCTGGCAACTGTGAGATGTTCATACAATCCCCCACAGTGGTCTCTGGGATTATGCTAAACAGAGCAATTTCCTTGCCCT ssc-mir-216 105
....(((.((..(((((.(((((((((..(((.((((((.(((((....)).)))...)))))).))).))))))))).))))).)).))).............. structure -35.70
******************TAATCTCAGCTGGCAACTGTG****************************************************************** ssc-miR-216 21
.................TTAATCTCAGCTGGCAACTGTG.................................................................. t0142795 22 1
..................TAATCTCAGCTGGCAACTGTGA................................................................. t0020274 22 16
>ssc-mir-217
ATAATTATTACAGAGTTTTTGATGTCGCAGATACTGCATCAGGAACTGATTGGATAAGAATTGGTCACCATCAGTTCTTAATGCATTGCCTTCAGCATCTAAACAAG ssc-mir-217 107
..............((((..(((((.(.((.((.(((((.((((((((((.((((........))).).)))))))))).))))).)).)).).))))).))))... structure -30.20
*******************************TACTGCATCAGGAACTGATTGGAT**************************************************** ssc-miR-217 24
..............................ATACTGCATCAGGAACTGATTGG...................................................... t0030188 23 8
..............................ATACTGCATCAGGAACTGATTG....................................................... t0054084 22 3
..............................ATACTGCATCAGGAACTGATTGGA..................................................... t0189618 24 1
...............................TACTGCATCAGGAACTGATTGG...................................................... t0014636 22 25
...............................TACTGCATCAGGAACTGATTGGA..................................................... t0016615 23 21
>ssc-mir-221
TGAACCTGGCATACAATGTAGATTTCTGTGTTTGTTGGGCAACAGCTACATTGTCTGCTGGGTTTCAGGC ssc-mir-221 70
.(((((..(((.(((((((((....(((((((.....))).))))))))))))).)))..)))))..... structure -28.60
*******************************************AGCTACATTGTCTGCTGGGTTT***** ssc-miR-221 22
TGAACCTGGCATACAATGTAGA................................................ t0045288 22 4
TGAACCTGGCATACAATGTAG................................................. t0263616 21 1
..AACCTGGCATACAATGTAGATT.............................................. t0059515 22 3
..AACCTGGCATACAATGTAGAT............................................... t0322085 21 1
...ACCTGGCATACAATGTAGATTTCTGT......................................... t0002565 26 252
...ACCTGGCATACAATGTAGATT.............................................. t0004392 21 130
...ACCTGGCATACAATGTAGATTTC............................................ t0006343 23 81
...ACCTGGCATACAATGTAGATTTCT........................................... t0008107 24 58
...ACCTGGCATACAATGTAGAT............................................... t0008796 20 52
...ACCTGGCATACAATGTAGATTTCTG.......................................... t0009002 25 50
...ACCTGGCATACAATGTAGATTT............................................. t0009452 22 47
...ACCTGGCATACAATGTAGA................................................ t0017952 19 19
...ACCTGGCATACAATGTAG................................................. t0032748 18 7
...ACCTGGCATACAATGTAGATTTCTGTG........................................ t0085734 27 2
.....CTGGCATACAATGTAGATTTCTGT......................................... t0083078 24 2
...........TACAATGTAGATTTCTGT......................................... t0294433 18 1
...........................................AGCTACATTGTCTGCTGGGTTT..... t0000930 22 758
...........................................AGCTACATTGTCTGCTGGGTT...... t0001605 21 437
...........................................AGCTACATTGTCTGCTGGGTTTC.... t0002289 23 289
...........................................AGCTACATTGTCTGCTGGGT....... t0002298 20 287
...........................................AGCTACATTGTCTGCTGGG........ t0004864 19 114
...........................................AGCTACATTGTCTGCTGGGTTTCA... t0018258 24 18
...........................................AGCTACATTGTCTGCTGG......... t0027212 18 10
...........................................AGCTACATTGTCTGCTGGGTTTCAG.. t0226283 25 1
............................................GCTACATTGTCTGCTGGGTTT..... t0032483 21 7
............................................GCTACATTGTCTGCTGGGT....... t0052847 19 4
............................................GCTACATTGTCTGCTGGGTTTC.... t0056188 22 3
............................................GCTACATTGTCTGCTGGGTT...... t0214779 20 1
............................................GCTACATTGTCTGCTGGG........ t0341549 18 1
..............................................TACATTGTCTGCTGGGTTT..... t0237631 19 1
>ssc-mir-224
GGGCTTTCAAGTCACTAGTGGTTCCGTTTAGTAGAAGGTTTTGCATTGTTTCAAAATGGTGCCCTAGTGACTACAAAGCCC ssc-mir-224 81
(((((((..(((((((((.(((.((((((.(.(((..((.....))..)))).)))))).))))))))))))..))))))) structure -33.90
*******CAAGTCACTAGTGGTTCCGTTTA*************************************************** ssc-miR-224 23
.......CAAGTCACTAGTGGTTCCGTTT.................................................... t0002081 22 324
.......CAAGTCACTAGTGGTTCCGTTTAG.................................................. t0003300 24 186
.......CAAGTCACTAGTGGTTCCGTTTAGT................................................. t0009635 25 45
.......CAAGTCACTAGTGGTTCCGTT..................................................... t0010447 21 40
.......CAAGTCACTAGTGGTTCCGTTTA................................................... t0013990 23 27
.......CAAGTCACTAGTGGTTCCGT...................................................... t0055493 20 3
.......CAAGTCACTAGTGGTTCCG....................................................... t0115078 19 2
........AAGTCACTAGTGGTTCCGTTTAG.................................................. t0034651 23 7
........AAGTCACTAGTGGTTCCGTTT.................................................... t0044662 21 4
.....................................................AAATGGTGCCCTAGTGACT......... t0117419 19 2
.....................................................AAATGGTGCCCTAGTGACTACA...... t0282496 22 1
>ssc-mir-23a
CGGCTGGGGTTCCTGGGGATGGGATTTGCTGCCTGTCACAAATCACATTGCCAGGGATTTCCAATCGACC ssc-mir-23a 70
((..((((((((((((.((((.((((((.((.....)))))))).)))).))))))).)))))..))... structure -30.80
*****************************************ATCACATTGCCAGGGATTTCC******** ssc-miR-23a 21
.....GGGGTTCCTGGGGATGGGATTT........................................... t0316720 22 1
.....GGGGTTCCTGGGGATGGGATTTGC......................................... t0323753 24 1
........................................AATCACATTGCCAGGGATTTCC........ t0023261 22 13
........................................AATCACATTGCCAGGGATT........... t0032659 19 7
........................................AATCACATTGCCAGGGATTTC......... t0057695 21 3
........................................AATCACATTGCCAGGGATTTCCA....... t0084112 23 2
........................................AATCACATTGCCAGGGATTT.......... t0101611 20 2
.........................................ATCACATTGCCAGGGATTTCC........ t0000240 21 5298
.........................................ATCACATTGCCAGGGATTTCCA....... t0000535 22 1553
.........................................ATCACATTGCCAGGGATTTC......... t0000545 20 1511
.........................................ATCACATTGCCAGGGATTTCCAA...... t0001765 23 394
.........................................ATCACATTGCCAGGGATTT.......... t0002397 19 273
.........................................ATCACATTGCCAGGGATT........... t0002720 18 234
.........................................ATCACATTGCCAGGGATTTCCAAT..... t0004028 24 146
..........................................TCACATTGCCAGGGATTTCC........ t0017336 20 20
..........................................TCACATTGCCAGGGATTTCCAAT..... t0031807 23 8
..........................................TCACATTGCCAGGGATTTCCA....... t0033702 21 7
..........................................TCACATTGCCAGGGATTTCCAA...... t0061096 22 3
..........................................TCACATTGCCAGGGATTTC......... t0288433 19 1
............................................ACATTGCCAGGGATTTCC........ t0002957 18 213
............................................ACATTGCCAGGGATTTCCA....... t0005641 19 94
............................................ACATTGCCAGGGATTTCCAA...... t0012055 20 33
............................................ACATTGCCAGGGATTTCCAAT..... t0036168 21 6
>ssc-mir-24
CTCTGCCTCCCGTGCCTACTGAGCTGAAACACAGTTGATTTGTGCAGACTGGCTCAGTTCAGCAGGAACAGG ssc-mir-24 72
........((.((.(((.(((((((((....(((((..........)))))..))))))))).))).)).)) structure -24.10
*************************************************TGGCTCAGTTCAGCAGGAACAG* ssc-miR-24 22
..........CGTGCCTACTGAGCTGAAACAC........................................ t0006011 22 87
..........CGTGCCTACTGAGCTGAAACACAG...................................... t0007738 24 62
..........CGTGCCTACTGAGCTGAAACACAGT..................................... t0011955 25 34
..........CGTGCCTACTGAGCTGAAAC.......................................... t0012803 20 30
..........CGTGCCTACTGAGCTGAAACACA....................................... t0013880 23 27
...........GTGCCTACTGAGCTGAAACAC........................................ t0005369 21 101
...........GTGCCTACTGAGCTGAAACACAG...................................... t0005743 23 93
...........GTGCCTACTGAGCTGAAACACAGT..................................... t0006567 24 78
...........GTGCCTACTGAGCTGAAACACA....................................... t0009347 22 47
...........GTGCCTACTGAGCTGAAAC.......................................... t0044653 19 4
...........GTGCCTACTGAGCTGAAACA......................................... t0046620 20 4
...........GTGCCTACTGAGCTGAAACACAGTT.................................... t0333884 25 1
............TGCCTACTGAGCTGAAACACAGT..................................... t0026319 23 10
............TGCCTACTGAGCTGAAACACAG...................................... t0032422 22 7
.............GCCTACTGAGCTGAAACACAGT..................................... t0205332 22 1
.......................................TTGTGCAGACTGGCTCAGTTCAGC......... t0118909 24 2
...........................................GCAGACTGGCTCAGTTCAGCAGGAACAG. t0047078 28 4
...........................................GCAGACTGGCTCAGTTCAGCAGGAACA.. t0377097 27 1
.............................................AGACTGGCTCAGTTCAGCAGGAACAG. t0038879 26 5
.............................................AGACTGGCTCAGTTCAGCAGGAAC... t0181597 24 1
...............................................ACTGGCTCAGTTCAGCAGGAA.... t0117094 21 2
................................................CTGGCTCAGTTCAGCAGGAAC... t0000323 21 3361
................................................CTGGCTCAGTTCAGCAGGAACAG. t0001339 23 532
................................................CTGGCTCAGTTCAGCAGGAACA.. t0002366 22 278
................................................CTGGCTCAGTTCAGCAGGAA.... t0008289 20 56
................................................CTGGCTCAGTTCAGCAGGA..... t0012454 19 32
................................................CTGGCTCAGTTCAGCAGG...... t0038329 18 6
................................................CTGGCTCAGTTCAGCAGGAACAGG t0349506 24 1
.................................................TGGCTCAGTTCAGCAGGAACAG. t0000032 22 93138
.................................................TGGCTCAGTTCAGCAGGAAC... t0000054 20 43271
.................................................TGGCTCAGTTCAGCAGGAACA.. t0000130 21 13764
.................................................TGGCTCAGTTCAGCAGGAA.... t0000496 19 1728
.................................................TGGCTCAGTTCAGCAGGAACAGG t0000532 23 1574
.................................................TGGCTCAGTTCAGCAGGA..... t0001308 18 546
..................................................GGCTCAGTTCAGCAGGAACAG. t0000974 21 727
..................................................GGCTCAGTTCAGCAGGAAC... t0001589 19 442
..................................................GGCTCAGTTCAGCAGGAACA.. t0004129 20 141
..................................................GGCTCAGTTCAGCAGGAACAGG t0012503 22 31
..................................................GGCTCAGTTCAGCAGGAA.... t0018727 18 18
...................................................GCTCAGTTCAGCAGGAACAGG t0010781 21 39
...................................................GCTCAGTTCAGCAGGAACAG. t0048117 20 4
...................................................GCTCAGTTCAGCAGGAACA.. t0303926 19 1
.....................................................TCAGTTCAGCAGGAACAGG t0018712 19 18
.....................................................TCAGTTCAGCAGGAACAG. t0196340 18 1
>ssc-mir-26a
GGCTGTGGCTGGATTCAAGTAATCCAGGATAGGCTGTTTCCATCTGTGAGGCCTATTCTTGATTACTTGTTTCTGGAGGCAGCT ssc-mir-26a 84
((((((..(..((..(((((((((.((((((((((..............)))))))))).)))))))))..))..)..)))))) structure -42.24
*************TTCAAGTAATCCAGGATAGGCT************************************************* ssc-miR-26a 22
............ATTCAAGTAATCCAGGATAGG................................................... t0209972 21 1
.............TTCAAGTAATCCAGGATAGG................................................... t0000036 20 76454
.............TTCAAGTAATCCAGGATAGGCT................................................. t0000039 22 67866
.............TTCAAGTAATCCAGGATAGGC.................................................. t0000101 21 18787
.............TTCAAGTAATCCAGGATAG.................................................... t0000373 19 2722
.............TTCAAGTAATCCAGGATA..................................................... t0001494 18 473
.............TTCAAGTAATCCAGGATAGGCTG................................................ t0003949 23 149
.............TTCAAGTAATCCAGGATAGGCTGT............................................... t0005386 24 100
.............TTCAAGTAATCCAGGATAGGCTGTTT............................................. t0312162 26 1
.............TTCAAGTAATCCAGGATAGGCTGTT.............................................. t0328993 25 1
..............TCAAGTAATCCAGGATAGGCT................................................. t0005583 21 96
..............TCAAGTAATCCAGGATAGG................................................... t0006655 19 76
..............TCAAGTAATCCAGGATAGGC.................................................. t0011204 20 37
..............TCAAGTAATCCAGGATAG.................................................... t0043908 18 5
..............TCAAGTAATCCAGGATAGGCTG................................................ t0070269 22 3
..............TCAAGTAATCCAGGATAGGCTGT............................................... t0298580 23 1
...............CAAGTAATCCAGGATAGG................................................... t0178651 18 1
...............CAAGTAATCCAGGATAGGC.................................................. t0184015 19 1
................AAGTAATCCAGGATAGGCT................................................. t0006527 19 78
................AAGTAATCCAGGATAGGC.................................................. t0023359 18 12
................AAGTAATCCAGGATAGGCTGT............................................... t0076804 21 2
.................AGTAATCCAGGATAGGCT................................................. t0129103 18 2
...................................................CCTATTCTTGATTACTTGTTTC........... t0026056 22 10
>ssc-mir-27a
TGGCCTGGGGAGCAGGGCTTAGCTGCTTGTGAGCAGGTCCACAGCAAGTCGTGTTCACAGTGGCTAAGTTCCGCCCCCTGGA ssc-mir-27a 82
...((.((((.((.(((((((((..((.(((((((.(.(........).).)))))))))..))))))))).)))))).)). structure -44.70
*****************************************************TTCACAGTGGCTAAGTTCCGC******** ssc-miR-27a 21
.............AGGGCTTAGCTGCTTGTGAGCA............................................... t0000540 22 1530
.............AGGGCTTAGCTGCTTGTGAGC................................................ t0005549 21 96
.............AGGGCTTAGCTGCTTGTGAGCAGG............................................. t0026618 24 10
.............AGGGCTTAGCTGCTTGTGAG................................................. t0030538 20 8
.............AGGGCTTAGCTGCTTGTGAGCAGGT............................................ t0032267 25 7
.............AGGGCTTAGCTGCTTGTGAGCAG.............................................. t0049864 23 4
.............AGGGCTTAGCTGCTTGTGA.................................................. t0329402 19 1
..............GGGCTTAGCTGCTTGTGAGCA............................................... t0041405 21 5
...................................GGTCCACAGCAAGTCGTG............................. t0233142 18 1
...............................................GTCGTGTTCACAGTGGCTAAGTTCCGC........ t0036915 27 6
...................................................TGTTCACAGTGGCTAAGT............. t0078431 18 2
...................................................TGTTCACAGTGGCTAAGTTCCGC........ t0106492 23 2
...................................................TGTTCACAGTGGCTAAGTTCCG......... t0371088 22 1
...................................................TGTTCACAGTGGCTAAGTTCC.......... t0373794 21 1
....................................................GTTCACAGTGGCTAAGTTCCGC........ t0031835 22 8
.....................................................TTCACAGTGGCTAAGTTCCGC........ t0000040 21 65569
.....................................................TTCACAGTGGCTAAGTTCCG......... t0000458 20 1933
.....................................................TTCACAGTGGCTAAGTTCC.......... t0001068 19 667
.....................................................TTCACAGTGGCTAAGTTC........... t0001349 18 530
.....................................................TTCACAGTGGCTAAGTTCCGCC....... t0019211 22 17
......................................................TCACAGTGGCTAAGTTCCGC........ t0120790 20 2
.......................................................CACAGTGGCTAAGTTCCGC........ t0161261 19 1
........................................................ACAGTGGCTAAGTTCCGC........ t0004678 18 119
>ssc-mir-28
GGTCCTTGCCCTCAAGGAGCTCACACTCTATTGAGTTGCCTTTCTGTCTTCCCCACTAGATTGTGAGCTCCTGGAGGGCAGGCACT ssc-mir-28 86
(((.(((((((((.(((((((((((.((((.((....................)).)))).))))))))))).))))))))).))) structure -43.85
*************AAGGAGCTCACACTCTATTGAG*************************************************** ssc-miR-28 22
.............AAGGAGCTCACACTCTATTG..................................................... t0275852 20 1
....................................................CCACTAGATTGTGAGCTCCTGGA........... t0013170 23 29
....................................................CCACTAGATTGTGAGCTCCTGG............ t0022247 22 13
....................................................CCACTAGATTGTGAGCTCCTG............. t0074965 21 2
....................................................CCACTAGATTGTGAGCTCCT.............. t0136431 20 1
.....................................................CACTAGATTGTGAGCTCCTGGA........... t0000187 22 8099
.....................................................CACTAGATTGTGAGCTCCTGGAG.......... t0000492 23 1744
.....................................................CACTAGATTGTGAGCTCCTGG............ t0000521 21 1615
.....................................................CACTAGATTGTGAGCTCCTG............. t0005327 20 102
.....................................................CACTAGATTGTGAGCTCCT.............. t0010108 19 42
.....................................................CACTAGATTGTGAGCTCC............... t0044403 18 4
.....................................................CACTAGATTGTGAGCTCCTGGAGG......... t0363113 24 1
......................................................ACTAGATTGTGAGCTCCTGGAG.......... t0001899 22 362
......................................................ACTAGATTGTGAGCTCCTGGA........... t0003069 21 204
......................................................ACTAGATTGTGAGCTCCTGG............ t0013893 20 27
......................................................ACTAGATTGTGAGCTCCTG............. t0023257 19 13
......................................................ACTAGATTGTGAGCTCCTGGAGG......... t0199918 23 1
.......................................................CTAGATTGTGAGCTCCTGGAG.......... t0035043 21 6
.......................................................CTAGATTGTGAGCTCCTGGA........... t0328989 20 1
>ssc-mir-29b
CTTCAGGAAGCTGGTTTCATATGGTGGTTTAGATTTAAAAAGTGATTGTCTAGCACCATTTGAAATCAGTGTTCTTGGGGG ssc-mir-29b 81
(((((((((((((((((((.((((((..((((((.............)))))))))))).)))))))))).))))))))). structure -34.02
**************************************************TAGCACCATTTGAAATCAGT*********** ssc-miR-29b 20
.........GCTGGTTTCATATGGTGGTTTAGA................................................ t0009657 24 45
.........GCTGGTTTCATATGGTGGTTT................................................... t0058196 21 3
.........GCTGGTTTCATATGGTGG...................................................... t0059079 18 3
.........GCTGGTTTCATATGGTGGTTTAG................................................. t0072650 23 2
.........GCTGGTTTCATATGGTGGTT.................................................... t0187936 20 1
.................................TTTAAAAAGTGATTGTCT.............................. t0140840 18 1
.................................................CTAGCACCATTTGAAATCAGTG.......... t0005341 22 102
.................................................CTAGCACCATTTGAAATCAGT........... t0011293 21 36
.................................................CTAGCACCATTTGAAATCAG............ t0023364 20 12
.................................................CTAGCACCATTTGAAATCAGTGT......... t0149201 23 1
..................................................TAGCACCATTTGAAATCAGTGTT........ t0001137 23 621
..................................................TAGCACCATTTGAAATCAGTGT......... t0004854 22 114
..................................................TAGCACCATTTGAAATCAGTG.......... t0007590 21 64
..................................................TAGCACCATTTGAAATCAGT........... t0013047 20 30
..................................................TAGCACCATTTGAAATCAG............ t0023810 19 12
..................................................TAGCACCATTTGAAATCA............. t0118887 18 2
...................................................AGCACCATTTGAAATCAGTGTT........ t0052745 22 4
...................................................AGCACCATTTGAAATCAGT........... t0291112 19 1
....................................................GCACCATTTGAAATCAGTGTT........ t0005686 21 93
....................................................GCACCATTTGAAATCAGTG.......... t0304127 19 1
>ssc-mir-29c
ATCTCTTACACAGGCTGACCGATTTCTCCTGGTGTTCAGAGTCTGTTTTTGTCTAGCACCATTTGAAATCGGTTATGATGTAnGGGGA ssc-mir-29c 88
.(((((...(((...(((((((((((...((((((((((((.....)))))...)))))))...)))))))))))...)))..))))) structure -32.00
*****************************************************TAGCACCATTTGAAATCGGTTA************* ssc-miR-29c 22
...............TGACCGATTTCTCCTGGTGTT.................................................... t0011137 21 37
...............TGACCGATTTCTCCTGGTGTTC................................................... t0013877 22 27
...............TGACCGATTTCTCCTGGTGTTCAG................................................. t0063439 24 3
...............TGACCGATTTCTCCTGGTG...................................................... t0073878 19 2
...............TGACCGATTTCTCCTGGTGT..................................................... t0076599 20 2
...............TGACCGATTTCTCCTGGTGTTCA.................................................. t0236990 23 1
...............TGACCGATTTCTCCTGGTGTTCAGA................................................ t0360807 25 1
................GACCGATTTCTCCTGGTGTTCA.................................................. t0037424 22 6
................GACCGATTTCTCCTGGTGTT.................................................... t0138636 20 1
.................ACCGATTTCTCCTGGTGTTCAGA................................................ t0011203 23 37
.................ACCGATTTCTCCTGGTGTTCAG................................................. t0013080 22 30
.................ACCGATTTCTCCTGGTGTTCAGAGT.............................................. t0040659 25 5
.................ACCGATTTCTCCTGGTGTTC................................................... t0052460 20 4
.................ACCGATTTCTCCTGGTGTTCA.................................................. t0068351 21 3
.................ACCGATTTCTCCTGGTGTT.................................................... t0094130 19 2
....................................................CTAGCACCATTTGAAATCGGTT.............. t0370880 22 1
.....................................................TAGCACCATTTGAAATCGGTT.............. t0000824 21 859
.....................................................TAGCACCATTTGAAATCGG................ t0001333 19 535
.....................................................TAGCACCATTTGAAATCGGTTA............. t0002078 22 326
.....................................................TAGCACCATTTGAAATCGGT............... t0002540 20 254
.....................................................TAGCACCATTTGAAATCG................. t0018415 18 18
.....................................................TAGCACCATTTGAAATCGGTTAT............ t0031432 23 8
......................................................AGCACCATTTGAAATCGGTT.............. t0083829 20 2
......................................................AGCACCATTTGAAATCGGT............... t0098416 19 2
......................................................AGCACCATTTGAAATCGG................ t0116937 18 2
......................................................AGCACCATTTGAAATCGGTTA............. t0373651 21 1
.......................................................GCACCATTTGAAATCGGT............... t0377309 18 1
>ssc-mir-30a
TCCCTGCGACAGTGAGCGGCTGTAAACATCCTCGACTGGAAGCTGTGAGGCTGAAGACGGGCTTTCAGTCGGATGTTTGCAGCCGCCGACTGCCTCCCGCATCAGGA ssc-mir-30a 107
(((.((((.((((..((((((((((((((((..(((((((((((((..........)).)))))))))))))))))))))))))))..)))).....))))...))) structure -55.20
********************TGTAAACATCCTCGACTGGAAG***************************************************************** ssc-miR-30a 22
.CCCTGCGACAGTGAGCGGC....................................................................................... t0061674 19 3
...................CTGTAAACATCCTCGACTGGAAGC................................................................ t0039221 24 5
...................CTGTAAACATCCTCGACTGG.................................................................... t0216953 20 1
....................TGTAAACATCCTCGACTGGAAGC................................................................ t0000015 23 262189
....................TGTAAACATCCTCGACTGGAAG................................................................. t0000122 22 14897
....................TGTAAACATCCTCGACTGG.................................................................... t0000127 19 14133
....................TGTAAACATCCTCGACTGGAAGCT............................................................... t0000129 24 13836
....................TGTAAACATCCTCGACTGGAA.................................................................. t0000353 21 2991
....................TGTAAACATCCTCGACTGGA................................................................... t0000423 20 2253
....................TGTAAACATCCTCGACTG..................................................................... t0004945 18 112
....................TGTAAACATCCTCGACTGGAAGCTG.............................................................. t0053171 25 4
....................TGTAAACATCCTCGACTGGAAGCTGT............................................................. t0100766 26 2
.....................GTAAACATCCTCGACTGGAAGC................................................................ t0001323 22 540
.....................GTAAACATCCTCGACTGGAAGCT............................................................... t0003837 23 154
.....................GTAAACATCCTCGACTGGAAG................................................................. t0012543 21 31
.....................GTAAACATCCTCGACTGG.................................................................... t0035005 18 6
.....................GTAAACATCCTCGACTGGA................................................................... t0054782 19 3
.....................GTAAACATCCTCGACTGGAA.................................................................. t0155245 20 1
......................TAAACATCCTCGACTGGAAGC................................................................ t0007145 21 69
......................TAAACATCCTCGACTGGAAGCT............................................................... t0010685 22 39
......................TAAACATCCTCGACTGGAAGCTG.............................................................. t0024184 23 12
......................TAAACATCCTCGACTGGAAG................................................................. t0054785 20 3
......................TAAACATCCTCGACTGGAA.................................................................. t0142693 19 1
.......................AAACATCCTCGACTGGAAGC................................................................ t0079116 20 2
.......................AAACATCCTCGACTGGAAGCT............................................................... t0307696 21 1
........................AACATCCTCGACTGGAAGC................................................................ t0091424 19 2
........................AACATCCTCGACTGGAAGCT............................................................... t0116611 20 2
.........................ACATCCTCGACTGGAAGC................................................................ t0044868 18 4
.........................ACATCCTCGACTGGAAGCT............................................................... t0077433 19 2
.............................................................CTTTCAGTCGGATGTTTGCAGC........................ t0000135 22 13508
.............................................................CTTTCAGTCGGATGTTTGCAG......................... t0000468 21 1880
.............................................................CTTTCAGTCGGATGTTTGC........................... t0001307 19 546
.............................................................CTTTCAGTCGGATGTTTGCA.......................... t0004069 20 143
.............................................................CTTTCAGTCGGATGTTTG............................ t0023015 18 13
.............................................................CTTTCAGTCGGATGTTTGCAGCC....................... t0029960 23 8
..............................................................TTTCAGTCGGATGTTTGCAGC........................ t0000479 21 1815
..............................................................TTTCAGTCGGATGTTTGCAG......................... t0003165 20 197
..............................................................TTTCAGTCGGATGTTTGC........................... t0016932 18 20
..............................................................TTTCAGTCGGATGTTTGCA.......................... t0030007 19 8
..............................................................TTTCAGTCGGATGTTTGCAGCC....................... t0039525 22 5
...............................................................TTCAGTCGGATGTTTGCAGC........................ t0042408 20 5
................................................................TCAGTCGGATGTTTGCAGC........................ t0281410 19 1
>ssc-mir-30b
TTTCAGTTCGTGTAAACATCCTACACTCAGCTGTAATACATGGATTGGCTGGGAGGTGGATGTTTACTTCAGCTGA ssc-mir-30b 76
..((((((...((((((((((.((.((((((((............))))))))..))))))))))))...)))))) structure -30.60
**********TGTAAACATCCTACACTCAGCT******************************************** ssc-miR-30b 22
..........TGTAAACATCCTACACTCAGCT............................................ t0000336 22 3230
..........TGTAAACATCCTACACTCAGC............................................. t0000609 21 1302
..........TGTAAACATCCTACACTCAG.............................................. t0008612 20 53
..........TGTAAACATCCTACACTC................................................ t0018516 18 18
..........TGTAAACATCCTACACTCA............................................... t0020480 19 15
..........TGTAAACATCCTACACTCAGCTG........................................... t0056903 23 3
................................................CTGGGAGGTGGATGTTTACTTC...... t0010967 22 38
................................................CTGGGAGGTGGATGTTTACTT....... t0031753 21 8
................................................CTGGGAGGTGGATGTTTACT........ t0039997 20 5
................................................CTGGGAGGTGGATGTTTACTTCA..... t0229724 23 1
.................................................TGGGAGGTGGATGTTTACTTC...... t0113332 21 2
>ssc-mir-30c
GACAGATACTGTAAACATCCTACACTCTCAGCTGTGGAAAGTAAGAAAGCTGGGAGAAGGCTGTTTACTCTCTCTGCCTT ssc-mir-30c 80
..((((....(((((((.(((...(((((((((..............))))))))).))).)))))))....)))).... structure -28.04
*********TGTAAACATCCTACACTCTCAGC************************************************ ssc-miR-30c 23
.........TGTAAACATCCTACACTCTCAGC................................................ t0000201 23 7259
.........TGTAAACATCCTACACTCTCAGCT............................................... t0000441 24 2054
.........TGTAAACATCCTACACTCTCAG................................................. t0001403 22 506
.........TGTAAACATCCTACACTCTCA.................................................. t0002017 21 337
.........TGTAAACATCCTACACTCTC................................................... t0004724 20 118
.........TGTAAACATCCTACACTCT.................................................... t0014729 19 25
.........TGTAAACATCCTACACTC..................................................... t0018516 18 18
..........GTAAACATCCTACACTCTCAGC................................................ t0049585 22 4
..........GTAAACATCCTACACTCTCAGCT............................................... t0307186 23 1
...........TAAACATCCTACACTCTCAGC................................................ t0238186 21 1
................................TGTGGAAAGTAAGAAAGC.............................. t0068010 18 3
.................................................CTGGGAGAAGGCTGTTTACTCT......... t0000434 22 2129
.................................................CTGGGAGAAGGCTGTTTACT........... t0005557 20 96
.................................................CTGGGAGAAGGCTGTTTACTC.......... t0005703 21 93
.................................................CTGGGAGAAGGCTGTTTAC............ t0019247 19 17
.................................................CTGGGAGAAGGCTGTTTA............. t0035316 18 6
..................................................TGGGAGAAGGCTGTTTACTCT......... t0004352 21 131
..................................................TGGGAGAAGGCTGTTTACTC.......... t0065829 20 3
..................................................TGGGAGAAGGCTGTTTACT........... t0099796 19 2
>ssc-mir-32
GGAGATATTGCACATTACTAAGTTGCATGTTGTCACGGCCTCAGTGCAATTTAGTGTGTGTGATATTTTC ssc-mir-32 70
((((((((..(((((.(((((((((((((..((....))..)).))))))))))))))))..)))))))) structure -31.90
*****TATTGCACATTACTAAGTTGC******************************************** ssc-miR-32 21
....ATATTGCACATTACTAAGTTGC............................................ t0012833 22 30
....ATATTGCACATTACTAAGTTGCA........................................... t0032893 23 7
....ATATTGCACATTACTAAGTTGCAT.......................................... t0176089 24 1
....ATATTGCACATTACTAAGTTG............................................. t0255362 21 1
.....TATTGCACATTACTAAGTTGC............................................ t0000732 21 1005
.....TATTGCACATTACTAAGTTGCA........................................... t0003553 22 170
.....TATTGCACATTACTAAGTTG............................................. t0008412 20 55
.....TATTGCACATTACTAAGTT.............................................. t0099217 19 2
.....TATTGCACATTACTAAGT............................................... t0168465 18 1
........TGCACATTACTAAGTTGCA........................................... t0149664 19 1
.............................................GCAATTTAGTGTGTGTGATATT... t0284433 22 1
..............................................CAATTTAGTGTGTGTGATATT... t0024807 21 11
..............................................CAATTTAGTGTGTGTGATAT.... t0305999 20 1
>ssc-mir-323
TTGGTACTTGGAGAGAGGTGGTCCGTGGCGCGTTCGCTTTATTTATGGCGCACATTACACGGTCGACCTCTTTGCGGTATCTAATC ssc-mir-323 86
..((((((.(.((((((((.(.(((((....((.((((........)))).))....))))).).)))))))).)))))))..... structure -37.00
*************************************************GCACATTACACGGTCGACCTCT*************** ssc-miR-323 22
...............AGGTGGTCCGTGGCGCGTTCG.................................................. t0067408 21 3
.................................................GCACATTACACGGTCGACC.................. t0069396 19 3
.................................................GCACATTACACGGTCGACCTCT............... t0284035 22 1
..................................................CACATTACACGGTCGACCTCT............... t0057727 21 3
..................................................CACATTACACGGTCGACCTC................ t0358141 20 1
>ssc-mir-325
AGTGCTTGGTTCCTAGTAGGTGTTCAGTAAGTGTTTGTGACATAATTCGTTTATTGAGCACCTCCTATCAATCAAGCACTGTGCTAGGTTCTGG ssc-mir-325 94
(((((((((((..(((.((((((((((((((((..(........)..)))))))))))))))).)))..))))))))))).............. structure -36.70
***********CCTAGTAGGTGTTCAGTAAGTGT************************************************************ ssc-miR-325 23
...........CCTAGTAGGTGTTCAGTAAGTG............................................................. t0060942 22 3
.................................................TTTATTGAGCACCTCCTATCA........................ t0138208 21 1
>ssc-mir-326
TCTGTCTGTTGGGCTGGAGGCAGGGCCTTTGTGCAGGCGGGTTGTGCTCAGATCGCCTCTGGGCCCTTCCTCCAGCCCAGAGGCGGATTCA ssc-mir-326 91
(((((((.((((((((((((.(((((((....(.(((((..(((....)))..)))))).))))))).))))))))))))))))))).... structure -59.90
*******************************************************CCTCTGGGCCCTTCCTCCAG**************** ssc-miR-326 20
.......................................................CCTCTGGGCCCTTCCTCCAGC............... t0020086 21 16
>ssc-mir-34a
TTTCTTTGGCAGTGTCTTAGCTGGTTGTTGTGAGTAATAGCAAAGGAAGCAATCAGCAGCATCCTGCCCTAGAACA ssc-mir-34a 76
.((((..(((((..(((..((((((((((.((........)).....)))))))))))).)..)))))..)))).. structure -24.40
******TGGCAGTGTCTTAGCTGGTTGT************************************************ ssc-miR-34a 22
....TTTGGCAGTGTCTTAGCTGG.................................................... t0079529 20 2
....TTTGGCAGTGTCTTAGCTGGTTG................................................. t0250223 23 1
......TGGCAGTGTCTTAGCTGGTTGT................................................ t0000807 22 882
......TGGCAGTGTCTTAGCTGGTTGTT............................................... t0001817 23 381
......TGGCAGTGTCTTAGCTGGTTG................................................. t0004349 21 131
......TGGCAGTGTCTTAGCTGGTTGTTG.............................................. t0015736 24 23
......TGGCAGTGTCTTAGCTGG.................................................... t0029022 18 9
......TGGCAGTGTCTTAGCTGGTT.................................................. t0029167 20 9
......TGGCAGTGTCTTAGCTGGT................................................... t0127960 19 2
......TGGCAGTGTCTTAGCTGGTTGTTGT............................................. t0220070 25 1
.......GGCAGTGTCTTAGCTGGTTGTT............................................... t0116130 22 2
..........AGTGTCTTAGCTGGTTGT................................................ t0073659 18 2
..........AGTGTCTTAGCTGGTTGTT............................................... t0329486 19 1
............................TGTGAGTAATAGCAAAGGAAG........................... t0100111 21 2
............................TGTGAGTAATAGCAAAGGAAGC.......................... t0364079 22 1
>ssc-mir-450
GTCTGTCAAAGAAAGATGCTAAACTGGTTTTGCGATGTGTTCCTAATATGCAGTATAAATATATTGGGAGCATTTTGCATGCATGGTTTTGTATCACTATACAGAT ssc-mir-450 106
((((((...((...(((((.((((((((..(((((.((((((((((((((.........)))))))))))))).))))).)).)))))).))))).))..)))))) structure -36.20
***************************TTTTGCGATGTGTTCCTAATAT********************************************************* ssc-miR-450 22
...........................TTTTGCGATGTGTTCCTAAT........................................................... t0001540 20 457
...........................TTTTGCGATGTGTTCCTAATA.......................................................... t0001701 21 410
...........................TTTTGCGATGTGTTCCTAATAT......................................................... t0004420 22 128
...........................TTTTGCGATGTGTTCCTAATATG........................................................ t0027071 23 10
...........................TTTTGCGATGTGTTCCTAA............................................................ t0028744 19 9
...........................TTTTGCGATGTGTTCCTA............................................................. t0068614 18 3
...........................TTTTGCGATGTGTTCCTAATATGC....................................................... t0255929 24 1
.............................................................TATTGGGAGCATTTTGCATGC........................ t0171157 21 1
...............................................................TTGGGAGCATTTTGCATGCA....................... t0203908 20 1
>ssc-mir-503
GCCCCGCACTCAGCCGTGCCCTAGCAGCGGGAACAGTACTGCAGTGGGCGATCGGTACTCTGGGGTATTGTTTCTGCTGCCCGGGCAAGGCTGGGACTCCCGCCGGGGC ssc-mir-503 109
(((((((.(((((((.(((((..(((((((((((((((((.(((.(..(.....)..).))).)))))))))))))))))..))))).)))))))......).)))))) structure -68.40
*********************TAGCAGCGGGAACAGTACTGCAG***************************************************************** ssc-miR-503 23
.....................TAGCAGCGGGAACAGTACTGCAG................................................................. t0002382 23 277
.....................TAGCAGCGGGAACAGTACT..................................................................... t0002665 19 240
.....................TAGCAGCGGGAACAGTACTG.................................................................... t0006033 20 87
.....................TAGCAGCGGGAACAGTAC...................................................................... t0012026 18 33
.....................TAGCAGCGGGAACAGTACTGCA.................................................................. t0070698 22 3
.....................TAGCAGCGGGAACAGTACTGCAGT................................................................ t0128792 24 2
.....................TAGCAGCGGGAACAGTACTGC................................................................... t0208195 21 1
......................AGCAGCGGGAACAGTACTGCAG................................................................. t0093859 22 2
......................AGCAGCGGGAACAGTACT..................................................................... t0316387 18 1
.......................GCAGCGGGAACAGTACTGCAG................................................................. t0214855 21 1
............................................................TGGGGTATTGTTTCTGCTGC............................. t0043753 20 5
............................................................TGGGGTATTGTTTCTGCTGCC............................ t0097885 21 2
............................................................TGGGGTATTGTTTCTGCTG.............................. t0354273 19 1
.............................................................GGGGTATTGTTTCTGCTGC............................. t0060457 19 3
.............................................................GGGGTATTGTTTCTGCTGCCCGG......................... t0296557 23 1
.............................................................GGGGTATTGTTTCTGCTGCCCG.......................... t0373329 22 1
>ssc-mir-7
TGGATGTTGGTCTAGTTCTGTGTGGAAGACTAGTGATTTTGTTGTTTTTAGATAACTAAATCGACAACAAATCACAGTCTGCCATATGGCACAGGCCATGCCTCTACAG ssc-mir-7 109
((((.((((((((.((.((((((((.(((((.(((((((.(((((((((((....)))))..)))))))))))))))))).)))))))).)))))))).)).))))... structure -45.10
**********************TGGAAGACTAGTGATTTTGTT****************************************************************** ssc-miR-7 21
..GATGTTGGTCTAGTTCTGTG....................................................................................... t0178465 20 1
...ATGTTGGTCTAGTTCTGTG....................................................................................... t0104086 19 2
......................TGGAAGACTAGTGATTTTGTTGTT............................................................... t0002478 24 261
......................TGGAAGACTAGTGATTTTGTTGT................................................................ t0004797 23 116
......................TGGAAGACTAGTGATTTTGTTG................................................................. t0012725 22 31
......................TGGAAGACTAGTGATTTTGT................................................................... t0015767 20 23
......................TGGAAGACTAGTGATTTTGTT.................................................................. t0029261 21 9
......................TGGAAGACTAGTGATTTTG.................................................................... t0033029 19 7
......................TGGAAGACTAGTGATTTTGTTGTTT.............................................................. t0038097 25 6
..........................AGACTAGTGATTTTGTTGTT............................................................... t0031765 20 8
..........................AGACTAGTGATTTTGTTGT................................................................ t0094005 19 2
............................ACTAGTGATTTTGTTGTT............................................................... t0018848 18 17
................................................................CAACAAATCACAGTCTGCCATA....................... t0012343 22 32
................................................................CAACAAATCACAGTCTGCCATAT...................... t0049408 23 4
................................................................CAACAAATCACAGTCTGCCAT........................ t0068697 21 3
................................................................CAACAAATCACAGTCTGCCA......................... t0348467 20 1
.................................................................AACAAATCACAGTCTGCCATA....................... t0011049 21 37
.................................................................AACAAATCACAGTCTGCCAT........................ t0064583 20 3
>ssc-mir-9-1
CGGGGTTGGTTGTTATCTTTGGTTATCTAGCTGTATGAGTGGTGTGGAGTCTTCATAAAGCTAGATAACCGAAAGTAAAAATAACCCCA ssc-mir-9-1 89
.(((((((....(((..(((((((((((((((.((((((.((.......)))))))).)))))))))))))))..)))...))))))). structure -42.00
***************TCTTTGGTTATCTAGCTGTATGA*************************************************** ssc-miR-9-1 23
...............TCTTTGGTTATCTAGCTGTATG.................................................... t0000999 22 710
...............TCTTTGGTTATCTAGCTGTATGA................................................... t0001061 23 671
...............TCTTTGGTTATCTAGCTGTAT..................................................... t0008421 21 55
...............TCTTTGGTTATCTAGCTGTA...................................................... t0024299 20 12
................CTTTGGTTATCTAGCTGTATG.................................................... t0034944 21 6
................CTTTGGTTATCTAGCTGTATGA................................................... t0039196 22 5
................CTTTGGTTATCTAGCTGT....................................................... t0106452 18 2
................CTTTGGTTATCTAGCTGTAT..................................................... t0273573 20 1
.................TTTGGTTATCTAGCTGTATG.................................................... t0027536 20 10
.................TTTGGTTATCTAGCTGTATGA................................................... t0044471 21 4
.................TTTGGTTATCTAGCTGTAT..................................................... t0101364 19 2
.................TTTGGTTATCTAGCTGTATGAG.................................................. t0286464 22 1
..................TTGGTTATCTAGCTGTATGA................................................... t0328670 20 1
......................................................ATAAAGCTAGATAACCGAAAGT............. t0016919 22 20
......................................................ATAAAGCTAGATAACCGAAAGTA............ t0045831 23 4
.......................................................TAAAGCTAGATAACCGAAAGTA............ t0022620 22 13
.......................................................TAAAGCTAGATAACCGAAAGT............. t0037083 21 6
.......................................................TAAAGCTAGATAACCGAAAG.............. t0162609 20 1
.......................................................TAAAGCTAGATAACCGAAAGTAA........... t0300908 23 1
>ssc-mir-9-2
GGAAGCGAGTTGTTATCTTTGGTTATCTAGCTGTATGAGTGTATTGGTCTTCATAAAGCTAGATAACCGAAAGTAAAAACTCCTTCA ssc-mir-9-2 87
.((((.(((((.(((..(((((((((((((((.((((((..(....)..)))))).)))))))))))))))..))).))))))))). structure -40.10
***************TCTTTGGTTATCTAGCTGTATGA************************************************* ssc-miR-9-2 23
...............TCTTTGGTTATCTAGCTGTATG.................................................. t0000999 22 710
...............TCTTTGGTTATCTAGCTGTATGA................................................. t0001061 23 671
...............TCTTTGGTTATCTAGCTGTAT................................................... t0008421 21 55
...............TCTTTGGTTATCTAGCTGTA.................................................... t0024299 20 12
................CTTTGGTTATCTAGCTGTATG.................................................. t0034944 21 6
................CTTTGGTTATCTAGCTGTATGA................................................. t0039196 22 5
................CTTTGGTTATCTAGCTGT..................................................... t0106452 18 2
................CTTTGGTTATCTAGCTGTAT................................................... t0273573 20 1
.................TTTGGTTATCTAGCTGTATG.................................................. t0027536 20 10
.................TTTGGTTATCTAGCTGTATGA................................................. t0044471 21 4
.................TTTGGTTATCTAGCTGTAT................................................... t0101364 19 2
.................TTTGGTTATCTAGCTGTATGAG................................................ t0286464 22 1
..................TTGGTTATCTAGCTGTATGA................................................. t0328670 20 1
....................................................ATAAAGCTAGATAACCGAAAGT............. t0016919 22 20
....................................................ATAAAGCTAGATAACCGAAAGTA............ t0045831 23 4
.....................................................TAAAGCTAGATAACCGAAAGTA............ t0022620 22 13
.....................................................TAAAGCTAGATAACCGAAAGT............. t0037083 21 6
.....................................................TAAAGCTAGATAACCGAAAG.............. t0162609 20 1
.....................................................TAAAGCTAGATAACCGAAAGTAA........... t0300908 23 1
>ssc-mir-95
AACACAGTGGGCGCTCAATAAATGTTTGTTGAATTGAGATGCGTTAAATTCAACGGGTATTTATTGAGCACCCACTCTGTG ssc-mir-95 81
.(((.((((((.((((((((((((..(((((((((...........)))))))))..)))))))))))).)))))).))). structure -41.50
************************************************TTCAACGGGTATTTATTGAGCA*********** ssc-miR-95 22
...............................................ATTCAACGGGTATTTATTGAGC............ t0098555 22 2
................................................TTCAACGGGTATTTATTGAGC............ t0000667 21 1138
................................................TTCAACGGGTATTTATTGAG............. t0006740 20 75
................................................TTCAACGGGTATTTATTGAGCA........... t0008219 22 57
................................................TTCAACGGGTATTTATTGA.............. t0020749 19 15
................................................TTCAACGGGTATTTATTG............... t0034945 18 6
...................................................AACGGGTATTTATTGAGC............ t0081301 18 2
>ssc-mir-99b
GGCACCCACCCGTAGAACCGACCTTGCGGGGCCTTCGCCGCACACAAGCTCGTGTCTGTGGGTCCGTGTC ssc-mir-99b 70
(((((..(((((((((..(((.((((.(((((....))).).).)))).)))..)))))))))..))))) structure -30.00
******CACCCGTAGAACCGACCTTGCG****************************************** ssc-miR-99b 22
.....CCACCCGTAGAACCGACCTTGC........................................... t0026224 22 10
.....CCACCCGTAGAACCGACCTTGCG.......................................... t0041795 23 5
......CACCCGTAGAACCGACCTTGC........................................... t0000063 21 35454
......CACCCGTAGAACCGACCTTGCG.......................................... t0000076 22 27312
......CACCCGTAGAACCGACCTTG............................................ t0001097 20 646
......CACCCGTAGAACCGACCTT............................................. t0005320 19 102
......CACCCGTAGAACCGACCTTGCGG......................................... t0012183 23 33
......CACCCGTAGAACCGACCT.............................................. t0012469 18 32
.......ACCCGTAGAACCGACCTTGC........................................... t0001157 20 613
.......ACCCGTAGAACCGACCTTGCG.......................................... t0001541 21 457
.......ACCCGTAGAACCGACCTTG............................................ t0029603 19 9
.........CCGTAGAACCGACCTTGCG.......................................... t0236967 19 1
............................................CAAGCTCGTGTCTGTGGGTCCG.... t0006024 22 87
............................................CAAGCTCGTGTCTGTGGGT....... t0014588 19 25
............................................CAAGCTCGTGTCTGTGGGTCC..... t0017644 21 19
............................................CAAGCTCGTGTCTGTGGGTCCGT... t0020453 23 15
............................................CAAGCTCGTGTCTGTGGGTC...... t0044015 20 5
............................................CAAGCTCGTGTCTGTGGG........ t0058979 18 3
.............................................AAGCTCGTGTCTGTGGGTCCG.... t0046356 21 4
.............................................AAGCTCGTGTCTGTGGGTCC..... t0310415 20 1
B. Known porcine miRNAs identified in Meishan
>ssc-let-7c
TGTGTGCATCCGGGTTGAGGTAGTAGGTTGTATGGTTTAGAGTTACACCGTGGGAGTTAACTGTACAACCTTCTAGCTTTCCTTGGAGCACACT ssc-let-7c 94
.((((((.((((((..(((.(((.(((((((((((((..((.(..(.....)..).))))))))))))))).))).)))..)))))))))))). structure -43.30
***************TGAGGTAGTAGGTTGTATGGTT********************************************************* ssc-let-7c 22
.............GTTGAGGTAGTAGGTTGTATGGT.......................................................... t0016826 23 28
.............GTTGAGGTAGTAGGTTGTATGG........................................................... t0023225 22 17
.............GTTGAGGTAGTAGGTTGTATGGTT......................................................... t0057596 24 4
.............GTTGAGGTAGTAGGTTGTATG............................................................ t0059971 21 4
..............TTGAGGTAGTAGGTTGTATGGT.......................................................... t0000377 22 3043
..............TTGAGGTAGTAGGTTGTATGGTT......................................................... t0000457 23 2242
..............TTGAGGTAGTAGGTTGTATGG........................................................... t0002660 21 305
..............TTGAGGTAGTAGGTTGTATGGTTT........................................................ t0008018 24 78
..............TTGAGGTAGTAGGTTGTATG............................................................ t0013535 20 38
..............TTGAGGTAGTAGGTTGTAT............................................................. t0014038 19 36
..............TTGAGGTAGTAGGTTGTA.............................................................. t0103440 18 2
...............TGAGGTAGTAGGTTGTATGGTT......................................................... t0000008 22 507428
...............TGAGGTAGTAGGTTGTATGGT.......................................................... t0000027 21 120886
...............TGAGGTAGTAGGTTGTATGGTTT........................................................ t0000087 23 25191
...............TGAGGTAGTAGGTTGTATGG........................................................... t0000121 20 17764
...............TGAGGTAGTAGGTTGTAT............................................................. t0000140 18 14261
...............TGAGGTAGTAGGTTGTATG............................................................ t0000355 19 3307
...............TGAGGTAGTAGGTTGTATGGTTTA....................................................... t0007811 24 81
...............TGAGGTAGTAGGTTGTATGGTTTAGA..................................................... t0197906 26 1
...............TGAGGTAGTAGGTTGTATGGTTTAG...................................................... t0379634 25 1
................GAGGTAGTAGGTTGTATGGTT......................................................... t0000256 21 5407
................GAGGTAGTAGGTTGTATGGT.......................................................... t0000649 20 1371
................GAGGTAGTAGGTTGTATGGTTT........................................................ t0003062 22 261
................GAGGTAGTAGGTTGTATGG........................................................... t0004682 19 156
................GAGGTAGTAGGTTGTATG............................................................ t0008327 18 75
.................AGGTAGTAGGTTGTATGGTT......................................................... t0037441 20 8
.................AGGTAGTAGGTTGTATGGT.......................................................... t0068966 19 4
.................AGGTAGTAGGTTGTATGGTTT........................................................ t0365688 21 1
..................GGTAGTAGGTTGTATGGTT......................................................... t0002139 19 390
..................GGTAGTAGGTTGTATGGT.......................................................... t0022189 18 18
..................GGTAGTAGGTTGTATGGTTT........................................................ t0025502 20 15
...................GTAGTAGGTTGTATGGTT......................................................... t0011524 18 48
...................GTAGTAGGTTGTATGGTTT........................................................ t0072297 19 3
....................TAGTAGGTTGTATGGTTT........................................................ t0040546 18 7
.....................................TAGAGTTACACCGTGGGAGTT.................................... t0064210 21 4
.....................................TAGAGTTACACCGTGGGAGT..................................... t0085507 20 3
.....................................TAGAGTTACACCGTGGGAGTTA................................... t0141673 22 2
.....................................TAGAGTTACACCGTGGGAG...................................... t0468427 19 1
............................................................CTGTACAACCTTCTAGCTTTCC............ t0015695 22 31
............................................................CTGTACAACCTTCTAGCTTTC............. t0071717 21 3
............................................................CTGTACAACCTTCTAGCTTTCCT........... t0083658 23 3
............................................................CTGTACAACCTTCTAGCTTT.............. t0442928 20 1
.............................................................TGTACAACCTTCTAGCTTTCC............ t0046904 21 6
>ssc-let-7f
TGTGGGATGAGGTAGTAGATTGTATAGTTTTAGGGTCATACCCCATCTTGGAGATAACTATACAGTCTACTGTCTTTCCCACG ssc-let-7f 83
.((((((.(((..((((((((((((((((...(((.....))).(((.....)))))))))))))))))))..))))))))). structure -40.70
*******TGAGGTAGTAGATTGTATAGTT****************************************************** ssc-let-7f 22
......ATGAGGTAGTAGATTGTATAGTT...................................................... t0025398 23 15
......ATGAGGTAGTAGATTGTATAGT....................................................... t0147306 22 2
......ATGAGGTAGTAGATTGTATAG........................................................ t0399949 21 1
.......TGAGGTAGTAGATTGTATAGTT...................................................... t0000009 22 500496
.......TGAGGTAGTAGATTGTATAGT....................................................... t0000022 21 149367
.......TGAGGTAGTAGATTGTATAG........................................................ t0000071 20 29465
.......TGAGGTAGTAGATTGTATAGTTT..................................................... t0000137 23 14691
.......TGAGGTAGTAGATTGTAT.......................................................... t0000406 18 2765
.......TGAGGTAGTAGATTGTATA......................................................... t0000555 19 1649
.......TGAGGTAGTAGATTGTATAGTTTT.................................................... t0005359 24 133
........GAGGTAGTAGATTGTATAGTT...................................................... t0000240 21 6005
........GAGGTAGTAGATTGTATAGT....................................................... t0000523 20 1805
........GAGGTAGTAGATTGTATAG........................................................ t0001845 19 457
........GAGGTAGTAGATTGTATAGTTT..................................................... t0003254 22 243
........GAGGTAGTAGATTGTATA......................................................... t0022413 18 18
........GAGGTAGTAGATTGTATAGTTTT.................................................... t0071859 23 3
.........AGGTAGTAGATTGTATAGT....................................................... t0017221 19 27
.........AGGTAGTAGATTGTATAGTT...................................................... t0019232 20 23
.........AGGTAGTAGATTGTATAG........................................................ t0048399 18 5
.........AGGTAGTAGATTGTATAGTTT..................................................... t0052424 21 5
..........GGTAGTAGATTGTATAGTT...................................................... t0001035 19 812
..........GGTAGTAGATTGTATAGT....................................................... t0001954 18 430
..........GGTAGTAGATTGTATAGTTT..................................................... t0035796 20 9
..........GGTAGTAGATTGTATAGTTTT.................................................... t0190411 21 1
...........GTAGTAGATTGTATAGTT...................................................... t0005518 18 129
...........GTAGTAGATTGTATAGTTT..................................................... t0036801 19 8
............TAGTAGATTGTATAGTTTTAGGG................................................ t0134665 23 2
............TAGTAGATTGTATAGTTT..................................................... t0358206 18 1
.........................................................CTATACAGTCTACTGTCTTTC..... t0026919 21 14
.........................................................CTATACAGTCTACTGTCTTT...... t0036630 20 8
>ssc-let-7i
CTGGCTGAGGTAGTAGTTTGTGCTGTTGGTCGGGTTGTGACATTGCCCGCTGTGGAGATAACTGCGCAAGCTACTGCCTTGCTAG ssc-let-7i 85
(((((.(((((((((((((((((.(((((.(((((.........)))))))........))).)))))))))))))))))))))) structure -42.10
*****TGAGGTAGTAGTTTGTGCT************************************************************* ssc-let-7i 19
....CTGAGGTAGTAGTTTGTGCTGT........................................................... t0067943 22 4
....CTGAGGTAGTAGTTTGTGCTG............................................................ t0094574 21 3
.....TGAGGTAGTAGTTTGTGCTGT........................................................... t0000068 21 31112
.....TGAGGTAGTAGTTTGTGCTG............................................................ t0000263 20 5295
.....TGAGGTAGTAGTTTGTGCTGTT.......................................................... t0000265 22 5176
.....TGAGGTAGTAGTTTGTGCTGTTG......................................................... t0000652 23 1359
.....TGAGGTAGTAGTTTGTGCT............................................................. t0001876 19 450
.....TGAGGTAGTAGTTTGTGC.............................................................. t0002055 18 406
.....TGAGGTAGTAGTTTGTGCTGTTGGT....................................................... t0052692 25 5
.....TGAGGTAGTAGTTTGTGCTGTTGG........................................................ t0065789 24 4
......GAGGTAGTAGTTTGTGCTGT........................................................... t0002099 20 397
......GAGGTAGTAGTTTGTGCTG............................................................ t0007370 19 88
......GAGGTAGTAGTTTGTGCTGTT.......................................................... t0008675 21 71
......GAGGTAGTAGTTTGTGCTGTTG......................................................... t0015220 22 32
......GAGGTAGTAGTTTGTGCT............................................................. t0075118 18 3
.......AGGTAGTAGTTTGTGCTGT........................................................... t0032162 19 10
.......AGGTAGTAGTTTGTGCTG............................................................ t0222399 18 1
........GGTAGTAGTTTGTGCTGT........................................................... t0000675 18 1304
........GGTAGTAGTTTGTGCTGTT.......................................................... t0001782 19 474
........GGTAGTAGTTTGTGCTGTTG......................................................... t0028218 20 13
.........GTAGTAGTTTGTGCTGTT.......................................................... t0014257 18 35
.............................................................CTGCGCAAGCTACTGCCTTG.... t0029312 20 12
.............................................................CTGCGCAAGCTACTGCCTTGC... t0048962 21 5
.............................................................CTGCGCAAGCTACTGCCTTGCT.. t0457016 22 1
>ssc-mir-101a-1
GACTGAACTGTCCTTTTTCGGTTATCATGGTACCGATGCTGTATATCTGAAAGGTACAGTACTGTGATAACTGAAGAATGGTGGTGCCATC ssc-mir-101a-1 91
...((.((..((.((((((((((((((((((((.(.((((............))))).)))))))))))))))))))).))..))..)).. structure -32.80
******************************************************TACAGTACTGTGATAACTGAA**************** ssc-miR-101a 21
.................TCGGTTATCATGGTACCGATGCT................................................... t0369090 23 1
..................................................AAGGTACAGTACTGTGATAACT................... t0099741 22 3
..................................................AAGGTACAGTACTGTGATAACTG.................. t0308758 23 1
..................................................AAGGTACAGTACTGTGATAA..................... t0385411 20 1
...................................................AGGTACAGTACTGTGATAACTGA................. t0053887 23 5
...................................................AGGTACAGTACTGTGATAACTG.................. t0215690 22 1
....................................................GGTACAGTACTGTGATAACTGA................. t0034897 22 9
....................................................GGTACAGTACTGTGATAACT................... t0069194 20 4
....................................................GGTACAGTACTGTGATAAC.................... t0121001 19 2
....................................................GGTACAGTACTGTGATAACTG.................. t0127948 21 2
.....................................................GTACAGTACTGTGATAACTGA................. t0000135 21 14833
.....................................................GTACAGTACTGTGATAACT................... t0000301 19 4209
.....................................................GTACAGTACTGTGATAACTG.................. t0000313 20 3974
.....................................................GTACAGTACTGTGATAACTGAA................ t0000314 22 3968
.....................................................GTACAGTACTGTGATAACTGAAG............... t0002975 23 269
.....................................................GTACAGTACTGTGATAAC.................... t0004801 18 152
.....................................................GTACAGTACTGTGATAACTGAAGA.............. t0019555 24 22
......................................................TACAGTACTGTGATAACTGAAG............... t0000046 22 57543
......................................................TACAGTACTGTGATAACTGAA................ t0000152 21 12031
......................................................TACAGTACTGTGATAACTGA................. t0000167 20 10782
......................................................TACAGTACTGTGATAACTGAAGA.............. t0000315 23 3962
......................................................TACAGTACTGTGATAACTG.................. t0000533 19 1754
......................................................TACAGTACTGTGATAACT................... t0004263 18 175
......................................................TACAGTACTGTGATAACTGAAGAA............. t0013899 24 37
......................................................TACAGTACTGTGATAACTGAAGAAT............ t0224605 25 1
.......................................................ACAGTACTGTGATAACTGAAG............... t0008699 21 71
.......................................................ACAGTACTGTGATAACTGAAGA.............. t0032330 22 10
.......................................................ACAGTACTGTGATAACTGAA................ t0032645 20 10
.......................................................ACAGTACTGTGATAACTGA................. t0052697 19 5
.......................................................ACAGTACTGTGATAACTG.................. t0365531 18 1
........................................................CAGTACTGTGATAACTGAAG............... t0040153 20 7
........................................................CAGTACTGTGATAACTGAA................ t0056017 19 4
........................................................CAGTACTGTGATAACTGA................. t0063411 18 4
........................................................CAGTACTGTGATAACTGAAGA.............. t0440100 21 1
.........................................................AGTACTGTGATAACTGAAG............... t0086599 19 3
.........................................................AGTACTGTGATAACTGAA................ t0149276 18 2
..........................................................GTACTGTGATAACTGAAG............... t0014146 18 36
..........................................................GTACTGTGATAACTGAAGA.............. t0092678 19 3
>ssc-mir-101a-2
GGCTGCCCTGGCTCAGTTATCACAGTGCTGATGCTGTCCATTCTAAAGGTACAGTACTGTGATAACTGAAGGATGGCAGCC ssc-mir-101a-2 81
(((((((.....((((((((((((((((((.((((............)))))))))))))))))))))).....))))))) structure -45.40
*************************************************TACAGTACTGTGATAACTGAA*********** ssc-miR-101a 21
............TCAGTTATCACAGTGCTGATG................................................ t0008320 21 75
............TCAGTTATCACAGTGCTGATGC............................................... t0011445 22 49
............TCAGTTATCACAGTGCTGATGCT.............................................. t0036335 23 8
............TCAGTTATCACAGTGCTGAT................................................. t0267893 20 1
.............CAGTTATCACAGTGCTGATGC............................................... t0013120 21 40
.............CAGTTATCACAGTGCTGATG................................................ t0023312 20 17
..............AGTTATCACAGTGCTGATGCTG............................................. t0054457 22 5
..............AGTTATCACAGTGCTGATGCT.............................................. t0116809 21 2
..............AGTTATCACAGTGCTGATGC............................................... t0134111 20 2
..............AGTTATCACAGTGCTGATG................................................ t0163584 19 2
.........................................TCTAAAGGTACAGTACTGTGATAACTGA............ t0115122 28 2
..........................................CTAAAGGTACAGTACTGTGATAACTGA............ t0017439 27 26
...........................................TAAAGGTACAGTACTGTGATAACTGA............ t0221011 26 1
.............................................AAGGTACAGTACTGTGATAACT.............. t0099741 22 3
.............................................AAGGTACAGTACTGTGATAACTG............. t0308758 23 1
.............................................AAGGTACAGTACTGTGATAA................ t0385411 20 1
..............................................AGGTACAGTACTGTGATAACTGA............ t0053887 23 5
..............................................AGGTACAGTACTGTGATAACTG............. t0215690 22 1
...............................................GGTACAGTACTGTGATAACTGA............ t0034897 22 9
...............................................GGTACAGTACTGTGATAACT.............. t0069194 20 4
...............................................GGTACAGTACTGTGATAAC............... t0121001 19 2
...............................................GGTACAGTACTGTGATAACTG............. t0127948 21 2
................................................GTACAGTACTGTGATAACTGA............ t0000135 21 14833
................................................GTACAGTACTGTGATAACT.............. t0000301 19 4209
................................................GTACAGTACTGTGATAACTG............. t0000313 20 3974
................................................GTACAGTACTGTGATAACTGAA........... t0000314 22 3968
................................................GTACAGTACTGTGATAACTGAAG.......... t0002975 23 269
................................................GTACAGTACTGTGATAAC............... t0004801 18 152
.................................................TACAGTACTGTGATAACTGAAG.......... t0000046 22 57543
.................................................TACAGTACTGTGATAACTGAA........... t0000152 21 12031
.................................................TACAGTACTGTGATAACTGA............ t0000167 20 10782
.................................................TACAGTACTGTGATAACTG............. t0000533 19 1754
.................................................TACAGTACTGTGATAACT.............. t0004263 18 175
.................................................TACAGTACTGTGATAACTGAAGG......... t0012771 23 42
.................................................TACAGTACTGTGATAACTGAAGGA........ t0023345 24 17
..................................................ACAGTACTGTGATAACTGAAG.......... t0008699 21 71
..................................................ACAGTACTGTGATAACTGAA........... t0032645 20 10
..................................................ACAGTACTGTGATAACTGA............ t0052697 19 5
..................................................ACAGTACTGTGATAACTG............. t0365531 18 1
...................................................CAGTACTGTGATAACTGAAG.......... t0040153 20 7
...................................................CAGTACTGTGATAACTGAA........... t0056017 19 4
...................................................CAGTACTGTGATAACTGA............ t0063411 18 4
....................................................AGTACTGTGATAACTGAAG.......... t0086599 19 3
....................................................AGTACTGTGATAACTGAA........... t0149276 18 2
.....................................................GTACTGTGATAACTGAAG.......... t0014146 18 36
>ssc-mir-103
CTTACTGCCCTCGGCTTCTTTACAGTGCTGCCTTGTTGCATATGGATCAAGCAGCATTGTACAGGGCTATGAAGGCACTGAG ssc-mir-103 82
((((.((((.((((((.((.(((((((((((.(((.(.(....).).)))))))))))))).))))))..)).)))).)))) structure -33.40
*************************************************AGCAGCATTGTACAGGGCTATGA********** ssc-miR-103 23
............GGCTTCTTTACAGTGCTGCCTTGT.............................................. t0248309 24 1
................................................AAGCAGCATTGTACAGGGCTATG........... t0083084 23 3
.................................................AGCAGCATTGTACAGGGCTATGA.......... t0000021 23 151598
.................................................AGCAGCATTGTACAGGGCTATG........... t0000123 22 17713
.................................................AGCAGCATTGTACAGGGCTAT............ t0001473 21 572
.................................................AGCAGCATTGTACAGGGCTATGAA......... t0002865 24 281
.................................................AGCAGCATTGTACAGGGCTA............. t0006456 20 104
.................................................AGCAGCATTGTACAGGGC............... t0008525 18 72
.................................................AGCAGCATTGTACAGGGCT.............. t0015885 19 30
.................................................AGCAGCATTGTACAGGGCTATGAAG........ t0027445 25 13
..................................................GCAGCATTGTACAGGGCTATGA.......... t0000928 22 908
..................................................GCAGCATTGTACAGGGCTATG........... t0006074 21 113
..................................................GCAGCATTGTACAGGGCTATGAA......... t0156296 23 2
..................................................GCAGCATTGTACAGGGCTAT............ t0466351 20 1
...................................................CAGCATTGTACAGGGCTATGA.......... t0002555 21 319
...................................................CAGCATTGTACAGGGCTATG........... t0015279 20 32
...................................................CAGCATTGTACAGGGCTATGAA......... t0125833 22 2
....................................................AGCATTGTACAGGGCTATGA.......... t0006370 20 106
....................................................AGCATTGTACAGGGCTATG........... t0026774 19 14
.....................................................GCATTGTACAGGGCTATGA.......... t0001783 19 474
.....................................................GCATTGTACAGGGCTATG........... t0008171 18 77
.....................................................GCATTGTACAGGGCTATGAA......... t0156857 20 2
......................................................CATTGTACAGGGCTATGA.......... t0012395 18 43
>ssc-mir-105-1
TGTGCATCGTAGTCAAATGCTCAGACTCCTGTGGTGGCTGCTCATGCACCACGGATGTTTGAGCATGTGCTACGGTGTCTA ssc-mir-105-1 81
...(((((((((.((.((((((((((..((((((((.(.......)))))))))..)))))))))).)))))))))))... structure -43.40
************TCAAATGCTCAGACTCCTGT************************************************* ssc-miR-105-1 20
............TCAAATGCTCAGACTCCTGTGG............................................... t0062965 22 4
>ssc-mir-106a
CCTTGGCCGTGTAAAAGTGCTTACAGTGCAGGTAGCTTTTTGAGATCTACTGCAATGCAAGCACTTCTTACATTACCATGG ssc-mir-106a 81
((.(((..((((((((((((((.((.(((((.(((.((.....)).)))))))).)).)))))))).))))))..))).)) structure -30.40
************AAAAGTGCTTACAGTGCAGGTAGC********************************************* ssc-miR-106a 24
............AAAAGTGCTTACAGTGCAGGTAG.............................................. t0005492 23 129
............AAAAGTGCTTACAGTGCAGGTA............................................... t0053803 22 5
............AAAAGTGCTTACAGTGCAGGT................................................ t0093789 21 3
............AAAAGTGCTTACAGTGCAG.................................................. t0215578 19 1
............AAAAGTGCTTACAGTGCAGG................................................. t0302903 20 1
.............AAAGTGCTTACAGTGCAGGTAG.............................................. t0002133 22 391
.............AAAGTGCTTACAGTGCAGGTA............................................... t0035250 21 9
.............AAAGTGCTTACAGTGCAG.................................................. t0043075 18 6
.............AAAGTGCTTACAGTGCAGGT................................................ t0063438 20 4
.............AAAGTGCTTACAGTGCAGG................................................. t0183083 19 2
.............AAAGTGCTTACAGTGCAGGTAGC............................................. t0297255 23 1
..............AAGTGCTTACAGTGCAGGTAG.............................................. t0345236 21 1
...............AGTGCTTACAGTGCAGGTAG.............................................. t0409100 20 1
>ssc-mir-107
TTCTCTCTGCTTTCAGCTTCTTTACAGTGTTGCCTTGTGGCATGGAGTTCAAGCAGCATTGTACAGGGCTATCAAAGCACAGAGAGC ssc-mir-107 87
((((((.((((((.((((.((.(((((((((((.(((.(((.....))))))))))))))))).))))))...)))))).)))))). structure -35.10
***************************************************AGCAGCATTGTACAGGGCTATCA************* ssc-miR-107 23
...................................................AGCAGCATTGTACAGGGCTAT............... t0001473 21 572
...................................................AGCAGCATTGTACAGGGCTA................ t0006456 20 104
...................................................AGCAGCATTGTACAGGGC.................. t0008525 18 72
...................................................AGCAGCATTGTACAGGGCTATC.............. t0009159 22 66
...................................................AGCAGCATTGTACAGGGCT................. t0015885 19 30
...................................................AGCAGCATTGTACAGGGCTATCA............. t0017395 23 26
....................................................GCAGCATTGTACAGGGCTATC.............. t0194254 21 1
....................................................GCAGCATTGTACAGGGCTAT............... t0466351 20 1
>ssc-mir-122
CCTTAGCAGAGCTGTGGAGTGTGACAATGGTGTTTGTGTCCAAACTATCAAACGCCATTATCACACTAAATAGCTACTGTTAGGC ssc-mir-122 85
.((((((((((((((..(((((((.(((((((((((.((....))...))))))))))).)))))))..)))))).)))))))). structure -44.20
**************TGGAGTGTGACAATGGTGTTTGT************************************************ ssc-miR-122 23
..............TGGAGTGTGACAATGGTGTTT.................................................. t0000910 21 928
..............TGGAGTGTGACAATGGTGTTTG................................................. t0002057 22 406
..............TGGAGTGTGACAATGGTGTTTGT................................................ t0003590 23 216
..............TGGAGTGTGACAATGGTGTT................................................... t0007984 20 79
..............TGGAGTGTGACAATGGTGT.................................................... t0017753 19 26
..............TGGAGTGTGACAATGGTG..................................................... t0020906 18 20
...............GGAGTGTGACAATGGTGTTT.................................................. t0180924 20 2
...............GGAGTGTGACAATGGTGTT................................................... t0383165 19 1
>ssc-mir-124a-1
TCAAGACCAGACTCTGCCCTCCGTGTTCACAGCGGACCTTGATTTAATGTCATACAATTAAGGCACGCGGTGAATGCCAAGAGCGGAGCCTACGGCTGCACTTGA ssc-mir-124a-1 105
(((((..(((.((((((.((..((((((((.(((..((((((((...........))))))))..))).))))))))..)).)))))).......)))..))))) structure -38.10
**********************************************************TAAGGCACGCGGTGAATGCCA************************** ssc-miR-124a 21
.........................................................TTAAGGCACGCGGTGAATGC............................ t0114765 20 2
.........................................................TTAAGGCACGCGGTGAATGCCAAG........................ t0210707 24 1
..........................................................TAAGGCACGCGGTGAATGC............................ t0056251 19 4
>ssc-mir-124a-2
AGGCCTCTCTCTCCGTGTTCACAGCGGACCTTGATTTAAATGTCCATACAATTAAGGCACGCGGTGAATGCCAAGAATGGGGCTG ssc-mir-124a-2 85
.((((((..(((..((((((((.(((..((((((((.............))))))))..))).))))))))..)))..)))))). structure -35.92
****************************************************TAAGGCACGCGGTGAATGCCA************ ssc-miR-124a 21
...................................................TTAAGGCACGCGGTGAATGC.............. t0114765 20 2
...................................................TTAAGGCACGCGGTGAATGCCAAG.......... t0210707 24 1
....................................................TAAGGCACGCGGTGAATGC.............. t0056251 19 4
>ssc-mir-125b
ACCAGACTTTTCCTAGTCCCTGAGACCCTAACTTGTGAGGTATTTTAGTAACATCACAAGTCAGGCTCTTGGGACCTAGGCGGAGGGGA ssc-mir-125b 89
.((...(((..(((((..((..(((.(((.((((((((..(((....)))...)))))))).))).)))..))..)))))..))).)). structure -40.60
****************TCCCTGAGACCCTAACTTGTGA*************************************************** ssc-miR-125b 22
................TCCCTGAGACCCTAACTTGTGA................................................... t0000056 22 42170
................TCCCTGAGACCCTAACTTGTG.................................................... t0000251 21 5593
................TCCCTGAGACCCTAACTTGT..................................................... t0000678 20 1297
................TCCCTGAGACCCTAACTTG...................................................... t0002348 19 351
................TCCCTGAGACCCTAACTTGTGAG.................................................. t0009139 23 66
................TCCCTGAGACCCTAACTT....................................................... t0021316 18 20
.................CCCTGAGACCCTAACTTGTGA................................................... t0027616 21 13
.................CCCTGAGACCCTAACTTGT..................................................... t0463281 19 1
..................CCTGAGACCCTAACTTGTGA................................................... t0000983 20 860
..................CCTGAGACCCTAACTTGTG.................................................... t0002805 19 287
..................CCTGAGACCCTAACTTGT..................................................... t0012502 18 43
..................CCTGAGACCCTAACTTGTGAG.................................................. t0103884 21 2
..................CCTGAGACCCTAACTTGTGAGGT................................................ t0277646 23 1
...................CTGAGACCCTAACTTGTGA................................................... t0032777 19 10
...................CTGAGACCCTAACTTGTGAGGT................................................ t0054629 22 5
...................CTGAGACCCTAACTTGTG.................................................... t0385678 18 1
....................TGAGACCCTAACTTGTGA................................................... t0009033 18 67
....................TGAGACCCTAACTTGTGAG.................................................. t0400210 19 1
....................................................ATCACAAGTCAGGCTCTTGGGAC.............. t0004752 23 153
....................................................ATCACAAGTCAGGCTCTTGGG................ t0011865 21 46
....................................................ATCACAAGTCAGGCTCTTGGGA............... t0012584 22 42
....................................................ATCACAAGTCAGGCTCTTGG................. t0034583 20 9
.....................................................TCACAAGTCAGGCTCTTGGGAC.............. t0002299 22 360
.....................................................TCACAAGTCAGGCTCTTGGGA............... t0009953 21 59
.....................................................TCACAAGTCAGGCTCTTGGG................ t0032774 20 10
[truncated: 1,409 more rows]
